# Supplementary material
Source: Research Square preprint supplement (doi:10.21203/rs.3.rs-8581843/v1)
Supplement: Supplementary file 1 [file 6039eb59d68a92587d92299a.docx]

**N terminal wobble base usage determines ribosome loading and thus protein expression fate**

Ruizhao Jiang1, Yukun Zheng1, Yuwen Wei1, Zhirao Zhang1, Mingye Song1, Shunshun Yang1, Ke Wang1, Yan Du5, Yilong Zhou6, Fulong Li5, Youxiang Liang5, Miaomiao Wang5, Huimin Yu1,2,3,4*

1 Department of Chemical Engineering, Key Laboratory of Industrial Biocatalysis (MOE), Tsinghua University, Beijing 100084, P. R. China

2 State Key Laboratory of Green Biomanufacturing, Beijing, P.R. China

3 Beijing Key Laboratory of Recombinant Protein Synthetic Biomanufacturing, Beijing, P.R. China

4 Center for Synthetic and Systems Biology, Tsinghua University, Beijing 100084, P.R. China

5 Beijing Evolyzer Co.,Ltd., 100176, P.R. China

6 Tanwei College, Tsinghua University, Beijing 100084, P.R. China

*Corresponding author:

Telephone: 86-10-62795492, Fax: 86-10-62770304,

E-mail: yuhm@tsinghua.edu.cn

Address: Yingshi Building 412, Tsinghua University, Beijing, China, 100084

Supplement Information

**Materials and methods**

1. Strains, plasmids, and chemical reagents

Competent cells *E.coli* DH5α and BL21(DE3) were purchased from Biomed Biologics (Beijing, China). The expression vector pET-28a(+) was stored in our laboratory.

DNA polymerase and restriction endonucleases were purchased from TaKaRa (Dalian, China) and Vazyme (Nanjing, China), respectively. DNA purification kits, gel extraction kits, and plasmid extraction kits were obtained from Solarbio (Beijing, China). The Gibson Assembly kit was supplied by Taihe Biotechnology (Beijing, China). Oligonucleotide primers were synthesized, and DNA sequencing was performed, by Azenta Life Sciences (Suzhou, China).

Yeast extract and tryptone for cell culture were purchased from OXOID (Hants, UK) and INALCO (Milan, Italy), respectively. Kanamycin and isopropyl-β-D-thiogalactopyranoside (IPTG) were purchased from Aladdin Co., Ltd (Shanghai, China).

1. Library construction and cell cultivation

Luria-Bertani (LB) medium (10 g/L tryptone, 5 g/L yeast extract, and 10 g/L NaCl) was used for the cultivation of *E. coli*. LB agar plates were prepared by supplementing the liquid medium with 15 g/L agar. A synonymous mutation library, with a diversity of over 106 variants and flanked by NcoI and NdeI restriction sites, was synthesized by Azenta Life Sciences (Suzhou, China). To construct the expression library, both the pET-28a(+) vector and the synonymous mutation library insert were digested with NcoI and NdeI restriction enzymes. The digestion reactions were carried out at 37°C for 3 hours. Following digestion, the linearized pET-28a(+) vector and the library fragments were ligated using 800 units of T4 DNA Ligase in T4 Ligase Buffer. The ligation reaction was performed in a total volume of 60 µL and incubated at 16°C for 18 hours. The resulting ligation product was purified using a DNA purification kit and eluted in 50 µL of nuclease-free water to yield the final pET-28a synonymous mutation library.For cultivation, 100 ng of the pooled plasmid library was transformed into chemically competent *E. coli BL21*(DE3) cells. The transformed cells were then plated onto LB agar plates containing 50 µg/mL kanamycin and incubated to obtain single colonies for subsequent screening.

1. Protein expression and fluorescence detection

For protein expression, a low-temperature induction protocol was adopted [1]. Single colonies were inoculated into LB medium containing 50 µg/mL kanamycin and cultured overnight at 37°C with shaking at 200 rpm. The overnight cultures were then used to inoculate fresh LB medium at a 1% (v/v) ratio. These new cultures were grown at 37°C until the optical density at 600 nm (OD600) reached a value between 0.6 and 0.8. At this point, protein expression was induced by the addition of isopropyl-β-D-thiogalactopyranoside (IPTG) to a final concentration of 0.5 mM. The cultures were subsequently transferred to a 16°C incubator and cultivated for an additional 24 hours. After induction, cells were harvested by centrifugation at 13,000 ×g for 20 minutes at 4°C. For fluorescence analysis, a portion of the cell pellet was resuspended in phosphate-buffered saline (PBS; 8.0 g/L NaCl, 0.2 g/L KCl, 1.44 g/L Na₂HPO₄, 0.24 g/L KH₂PO₄, pH 7.4–7.6) to a final OD600 of 3.0. The fluorescence intensity of mCherry was measured using an Infinite M200 Pro microplate reader (TECAN), with an excitation wavelength of 535 nm and an emission wavelength of 620 nm.

1. Polysome Profiling

Polysome Profiling services were provided by Geneseed Biotech Co.,Ltd. (Guangzhou, China) Cryopreserved bacterial samples were thawed on ice. The cells were resuspended in 300-500 μL of polysome profiling lysis buffer and lysed on ice for 30 minutes with gentle agitation. The cell lysate was then clarified by centrifugation at 13,000 × g for 10 minutes at 4°C. The resulting supernatant was carefully collected for immediate use.

Linear 10-45% (w/v) sucrose gradients were prepared in SW41 ultracentrifuge tubes using a gradient maker, with 10% and 45% sucrose solutions prepared in a suitable polysome buffer.

Ultracentrifugation and Fraction Collection: Approximately 100 μL of the clarified cell lysate was carefully layered onto the top of the prepared 10-45% sucrose gradients. The tubes were balanced and then centrifuged at 36,000 rpm for 3 hours at 4°C in an SW41 rotor. After ultracentrifugation, the gradients were carefully removed and fractionated from top to bottom. Fractions corresponding to different ribosomal complexes were collected for subsequent analysis.

1. RT-qPCR Analysis

Total RNA from each fraction was reverse transcribed into cDNA. The first-strand cDNA synthesis was carried out in a 20 μL reaction volume containing 1 µg of total RNA, 2 µL of Reverse Transcription Primer, 10 µL of 2×RT Mix, 1 µL of Geneseed® Enzyme Mix, and RNase-free ddH₂O up to 20 µL. The reaction was performed under the following conditions: 25°C for 10 min, followed by 42°C for 60 min, and terminated by heating at 85°C for 5 min.

The mCherry (mch) transcript was quantified using the primers mch-F2 (5'-AAGGGCGAGATCAAGCAGA-3') and mch-R2 (5'-GGTGTAGTCCTCGTTGTGGG-3'), which amplify a 156 bp fragment. The qPCR reaction was set up in a 20 µL volume containing 5 µL of diluted cDNA (1:10), 0.4 µL of each forward and reverse primer (10 µM), 10 µL of 2×SYBR Green PCR Master Mix, and ddH₂O up to 20 µL. The qPCR was performed on an ABI 7500 Real-Time PCR System with the following program: initial denaturation at 95°C for 5 min, followed by 40 cycles of 95°C for 10 sec and 60°C for 34 sec (signal acquisition). A melting curve analysis was performed at the end of the amplification.

The percentage of target mRNA in each fraction was calculated based on the method described by Li et al.[2]. The average Ct value for each fraction was used to calculate the relative abundance of the transcript in each part of the gradient, and the results were plotted to visualize the distribution.

X=the number of the fraction that is calculated; Y= the total number of fractions.

1. Quantitative Proteomics by Astral DIA

Cell samples were retrieved from -80°C storage and cryogenically ground into a powder. The powder was quickly transferred to a liquid nitrogen-prechilled tube and dissolved in SDT buffer (containing 100 mM NaCl) with DTT added to a final concentration of 1/100 (v/v). The mixture was thoroughly vortexed and sonicated in an ice-water bath for 5 min for complete lysis. The lysate was clarified by centrifugation at 12,000 × g for 15 min at 4°C. The supernatant was collected and heated at 95°C for 8-15 min, followed by a 2 min ice bath. Proteins were alkylated by adding iodoacetamide (IAM) solution and incubating in the dark for 1 hour. Proteins were then precipitated by adding four volumes of pre-chilled (-20°C) acetone and incubating at -20°C for at least 30 min. The precipitate was collected by centrifugation (12,000 × g, 15 min, 4°C), washed once with 1 mL of pre-chilled (-20°C) acetone, and air-dried. The resulting total protein pellet was redissolved in Dissolved Buffer (DB buffer; 6 M urea, 100 mM TEAB, pH 8.5) to a final volume of 100 μL. Trypsin was added, and the protein solution was incubated at 37°C for 4 hours for enzymatic digestion. The reaction was stopped by adding formic acid to adjust the pH to < 3. The sample was centrifuged at 12,000 × g for 5 min, and the supernatant was desalted using a C18 column. The column was washed three times with a wash solution (0.1% formic acid, 3% acetonitrile), and peptides were eluted with an elution buffer (0.1% formic acid, 70% acetonitrile). The collected eluate was lyophilized.

The lyophilized peptide powder was redissolved in 10 µL of mobile phase A (0.1% formic acid in water). The sample was centrifuged at 14,000 × g for 20 min at 4°C, and 200 ng of the supernatant was injected for LC-MS/MS analysis. The analysis was performed using a Vanquish Neo UHPLC system coupled to a Thermo Orbitrap Astral mass spectrometer. Peptides were separated on a C18 analytical column (ES906, PepMap TM Neo UHPLC, 150 µm x 15 cm, 2μm, Thermo) heated to 50°C, with a C18 pre-column (174500, 5mm×300 µm, 5 µm, Thermo). The mobile phase B was 80% acetonitrile with 0.1% formic acid. The mass spectrometer was operated in Data-Independent Acquisition (DIA) mode with an Easy-spray (ESI) ion source. The spray voltage was set to 2.0 kV, and the ion transfer tube temperature was 290°C. MS1 full scans were acquired over a range of m/z 380-980 with a resolution of 240,000 (at 200 m/z) and an AGC target of 500%. For DIA, 300 windows of 2-Th width were used with a normalized collision energy (NCE) of 25%. MS2 spectra were acquired over a range of m/z 150-2000 with an Astral resolution of 80,000 and a maximum injection time of 3 ms.

The raw mass spectrometry data files (.raw) were analyzed using DIA-NN software against a protein database. The software identified protein amino acid sequences and their corresponding gene IDs, which were then mapped back to the respective nucleotide sequences.

1. tRNASequencing

tRNA sequencing services were provided by Cloud-seq Biotech Inc., Ltd. (Shanghai, China). The procedure is briefly described as follows. Total RNA was first processed to enrich for small RNA molecules less than 200 nt in length using the mirVana™ miRNA Isolation Kit (ThermoFisher). The enriched small RNA fraction was then treated with AlkB enzyme for 100 minutes at 37°C to remove modifications that could interfere with reverse transcription. Following treatment, small RNA libraries were constructed using the GenSeq® Small RNA Library Prep Kit (GenSeq, Inc.) according to the manufacturer's instructions. The libraries were size-selected to specifically enrich for fragments corresponding to the length of tRNAs. The final libraries were sequenced on an Illumina NovaSeq platform.

A reference tRNA database was first established. tRNA sequences were downloaded from the GtRNAdb database (http://gtrnadb.ucsc.edu/GtRNAdb2/genomes), and representative tRNAs were selected based on their anticodon and score. A 'CCA' trinucleotide was appended to the 3' end of each selected tRNA sequence to form the final reference.Raw sequencing reads obtained after image analysis and base calling underwent quality control. Reads were filtered based on a Q30 quality score. The cutadapt software (v1.9.3) [3] was used to trim adapter sequences and remove low-quality reads. Only reads with a length of 15 nt or greater were retained for further analysis, referred to as trimmed reads.The trimmed reads from each sample were then aligned to the prepared tRNA reference database using bowtie2 (v2.2.4) [4]. Finally, samtools (v1.3.1) [5] was employed to count the number of reads that aligned to each specific tRNA. This read count was considered the raw expression level for the corresponding tRNA.

1. Surface plasmon resonance analysis

Surface plasmon resonance (SPR) experiments were performed using a Biacore™ 8K Surface Plasmon Resonance (SPR) system to quantitatively characterize the binding kinetics between *Escherichia coli* 70S ribosomes and N-terminal mRNA sequences. All measurements were conducted in a Mg²⁺-containing buffer (e.g., 10 mM PBS, pH 7.4, 5 mM MgCl₂, and 0.005% Tween-20) to maintain the integrity and stability of the 70S ribosomes.

Biotinylated mRNA fragments corresponding to the first 18 bp immediately downstream of the translation initiation site were used as ligands. Some sequences contained a canonical Shine–Dalgarno (SD) motif upstream of the coding region. Biotinylated mRNA ligands were immobilized on a streptavidin-coated sensor chip via biotin–streptavidin interactions.

Purified 70S ribosomes were used as analytes and injected over the immobilized mRNA surface at increasing concentrations. Ribosome association and dissociation were recorded in real time. Each binding cycle consisted of an association phase followed by a dissociation phase.

Sensorgrams were reference-subtracted and globally fitted to a 1:1 Langmuir binding model to derive the association rate constant (ka), dissociation rate constant (kd), and equilibrium dissociation constant (KD).


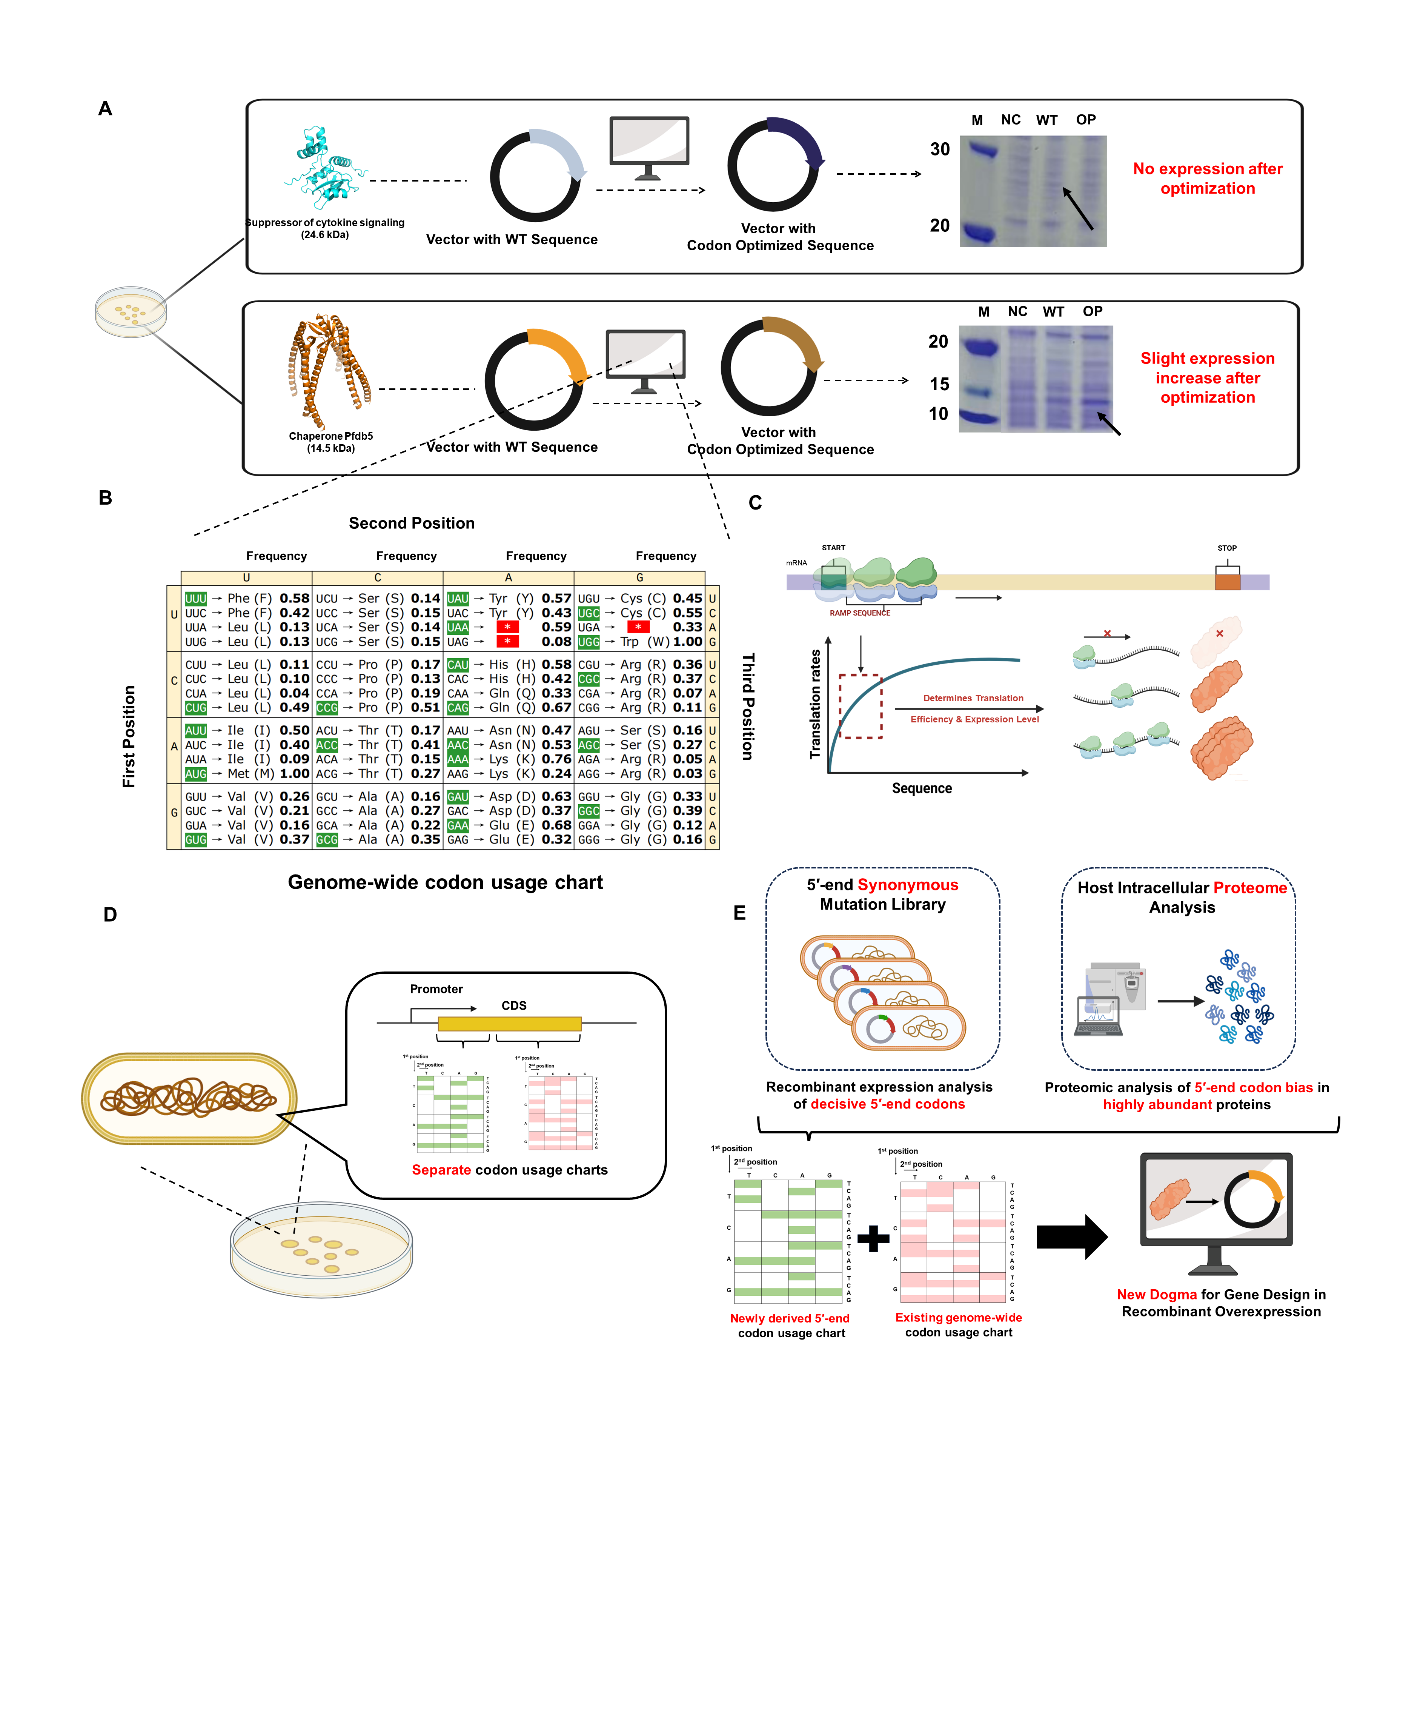


**Figure S1. Workflow for establishing a new dogma in recombinant protein overexpression. (A)** Traditional sequence design strategies primarily focus on rare codon replacement. However, for the human cytokine signaling suppressor, expression failed even after codon optimization in *E.coli*. In the case of the molecular chaperone Pfdb6, codon optimization yielded only a marginal increase compared with the wild-type sequence. SDS-PAGE analysis: M = marker; NC = negative control; WT = wild-type sequence; OP = sequence optimized using commercial codon optimization tools. **(B)** Commonly used codon usage chart for *E.coli* derived from the Kazusa database. Codons highlighted in green represent the recommended optimal codons for each amino acid. **(C)** A “ramp sequence” downstream of the start codon modulates translation initiation and early elongation rates, exerting a decisive effect on protein expression.

**(D)** Within ramp regions, codon usage preferences significantly differ from those observed in downstream coding sequences, indicating the need for two distinct codon tables.

**(E)** By integrating a 5′ synonymous mutation library with endogenous proteome analysis, a 5′-end-specific codon table was constructed. Together with conventional full-length codon tables, this enables the establishment of a new dogma for recombinant protein overexpression.


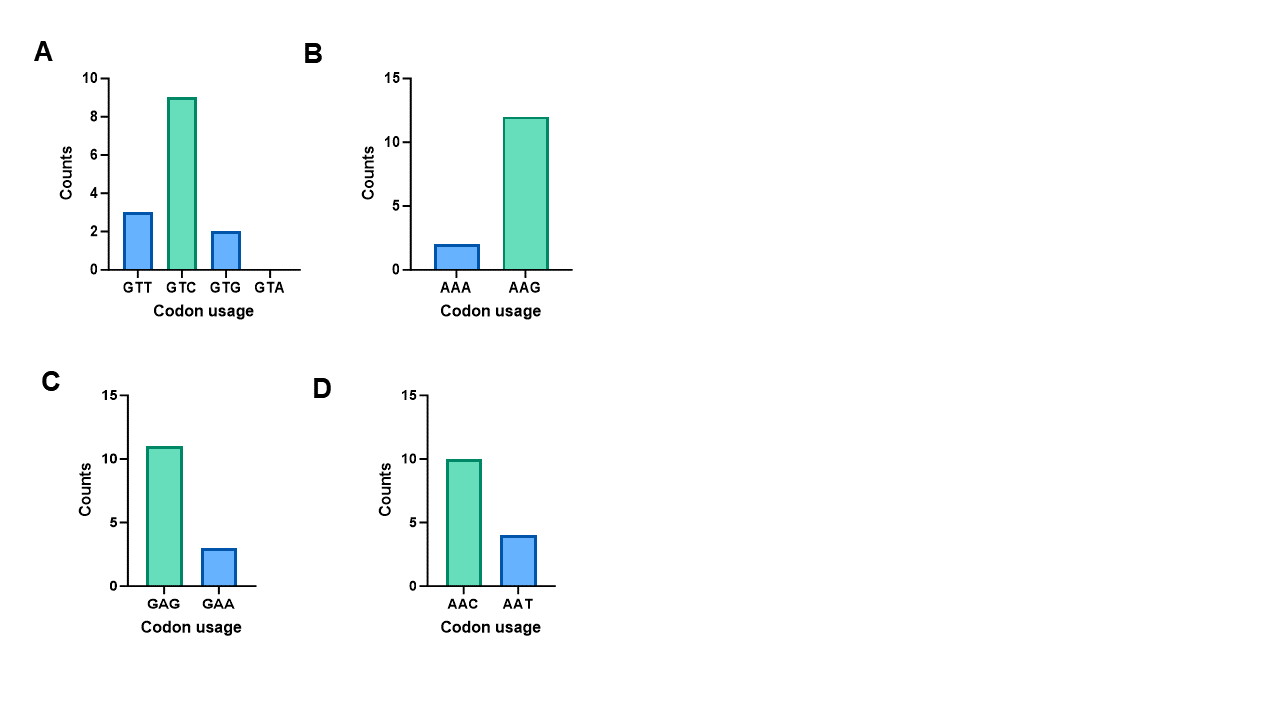


**Figure S2. Occurrence frequency of specific codons in the lowest 5% fluorescence sequences of the mCherry library.**

(A) Occurrence counts of the four valine codons at the second codon position.(B) Occurrence counts of the two lysine codons at the fourth codon position. (C) Occurrence counts of the two glutamate codons at the sixth codon position. (D) Occurrence counts of the two asparagine codons at the ninth codon position.


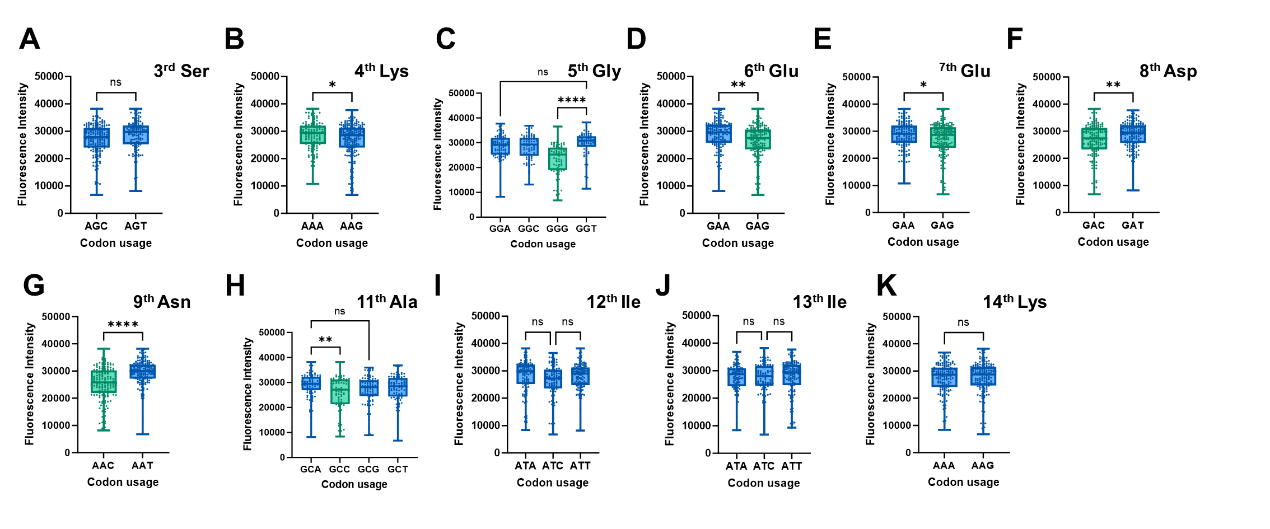


**Figure S3. Analysis of codon usage at other positions in the *mCherry* library.**

1. Serine at position 3. **(B)** Lysine at position 4, with AAG identified as an NIC. **(C)** Glycine at position 5, with GGG identified as an NIC. **(D)** Glutamic acid at position 6, with GAG identified as an NIC. **(E)** Glutamic acid at position 7. **(F)** Aspartic acid at position 8, with GAC identified as an NIC.**(G)** Alanine at position 9, with GCC identified as a 5′-LEC. **(H)** Alanine at position 9, with GCC identified as an NIC. **(I)** Isoleucine at position 12. **(J)** Isoleucine at position 13. **(K)** Lysine at position 14.


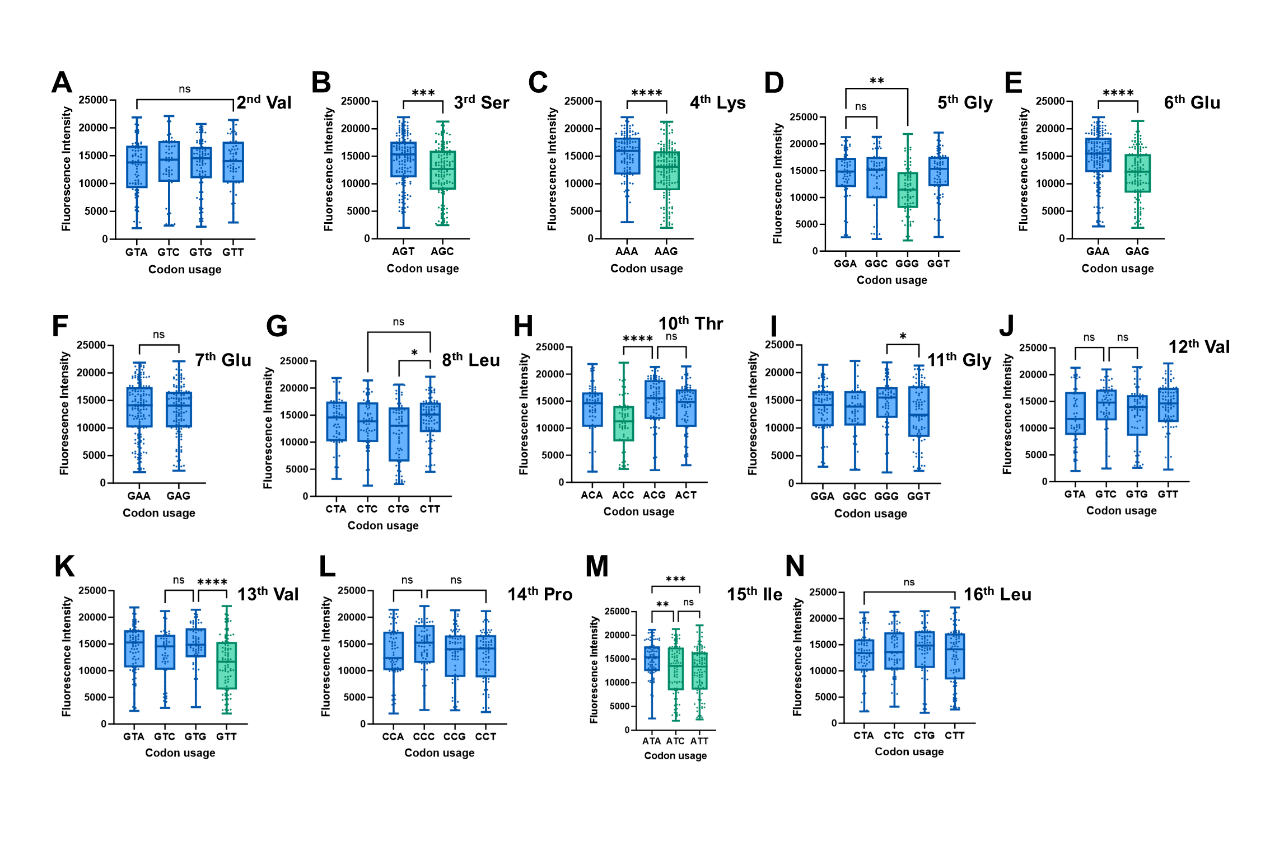


**Figure S4. Analysis of codon usage at various positions in the *GFP* library.**
**(A)** Valine at position 2. **(B)** Serine at position 3, with TCG identified as a NIC. **(C)** Lysine at position 4, with AAG identified as an NIC. **(D)** Glycine at position 5, with GGG identified as an NIC. **(E)** Glutamic acid at position 6, with GAG identified as an NIC. **(F)** Glutamic acid at position 7. **(G)** Leucine at position 8. **(H)** Threonine at position 10, with ACC identified as an NIC. **(I)** Glycine at position 11. (J) Valine at position 12. **(K)** Valine at position 13, with GTT identified as an NIC. **(L)** Proline at position 14. **(M)** Isoleucine at position 15, with ATC and ATT identified as NICs. **(N)** Leucine at position 16.


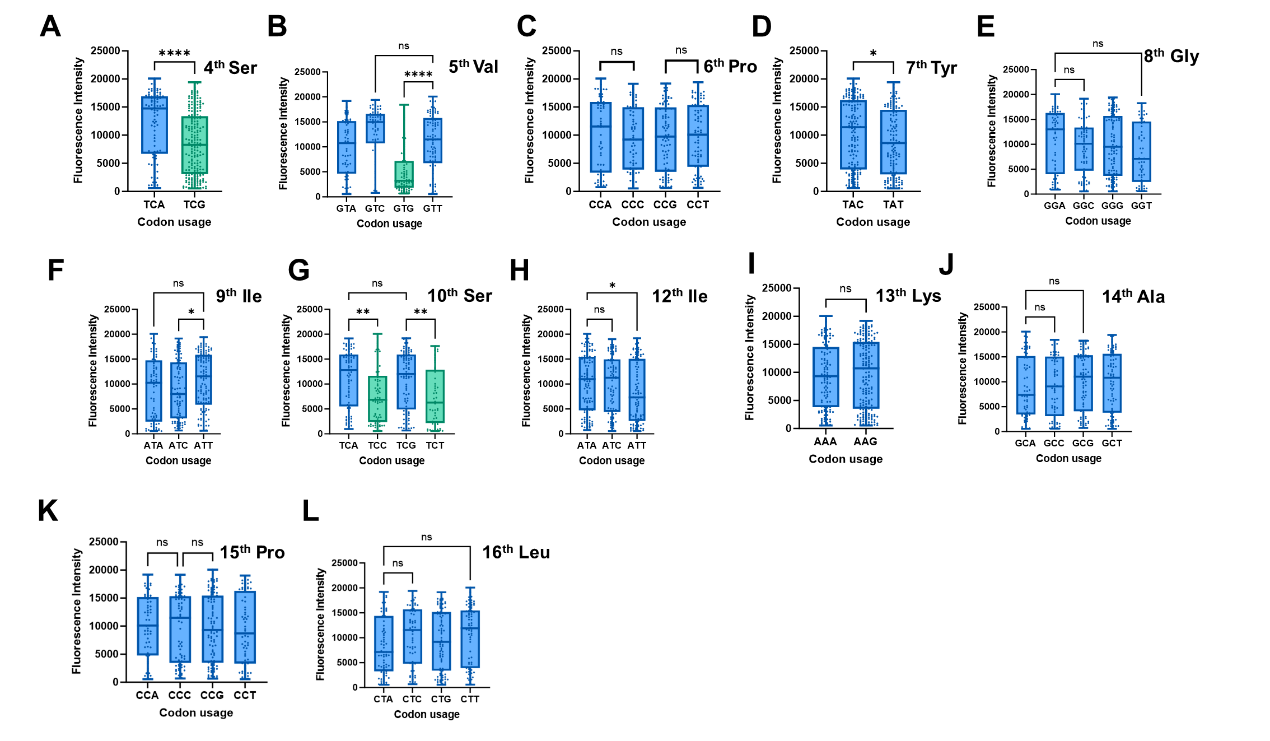


**Figure S5. Analysis of codon usage at various positions in the *NK* library. (A)** Serine at position 4, with TCG identified as an NIC. **(B)** Valine at position 5, with GTG identified as an NIC. **(C)** Proline at position 6. **(D)** Tyrosine at position 7. **(E)** Glycine at position 8. **(F)** Isoleucine at position 9. **(G)** Serine at position 10, with TCG and TCT identified as NICs. **(H)** Isoleucine at position 12. **(I)** Lysine at position 13. **(J)** Alanine at position 14. **(K)** Proline at position 15. **(L)** Leucine at position 16.


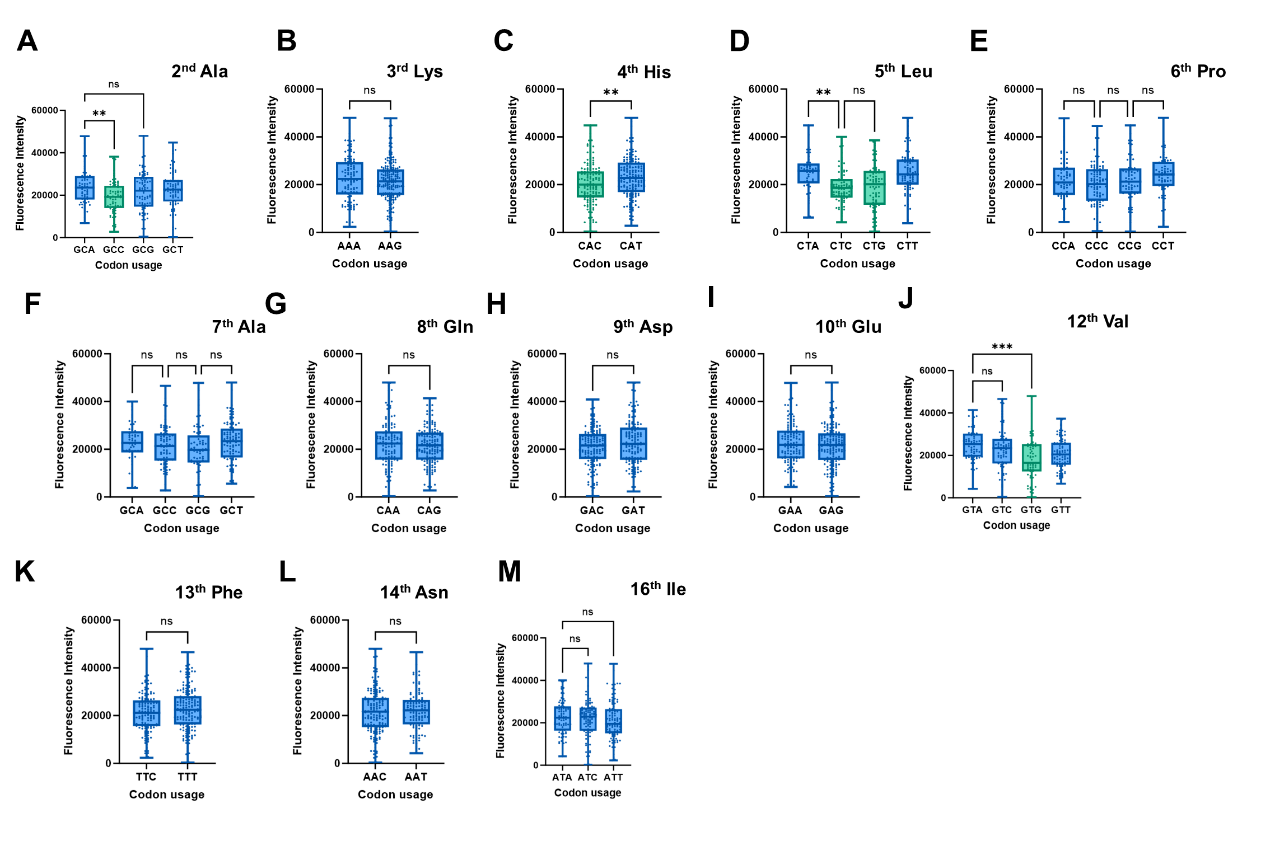


**Figure S6. Analysis of codon usage at various positions in the *Bsu* library.** **(A)** Alanine at position 2, with GCC identified as an NIC. **(B)** Lysine at position 3. **(C)** Histidine at position 4, with CAC identified as an NIC. **(D)** Leucine at position 5, with CTC and CTG identified as NICs. **(E)** Proline at position 6. **(F)** Alanine at position 7. **(G)** Glutamine at position 8. **(H)** Aspartic acid at position 9. **(I)** Glutamic acid at position 10. **(J)** Valine at position 12, with GTG identified as an NIC. **(K)** Phenylalanine at position 13. **(L)** Asparagine at position 14. **(M)** Isoleucine at position 16.


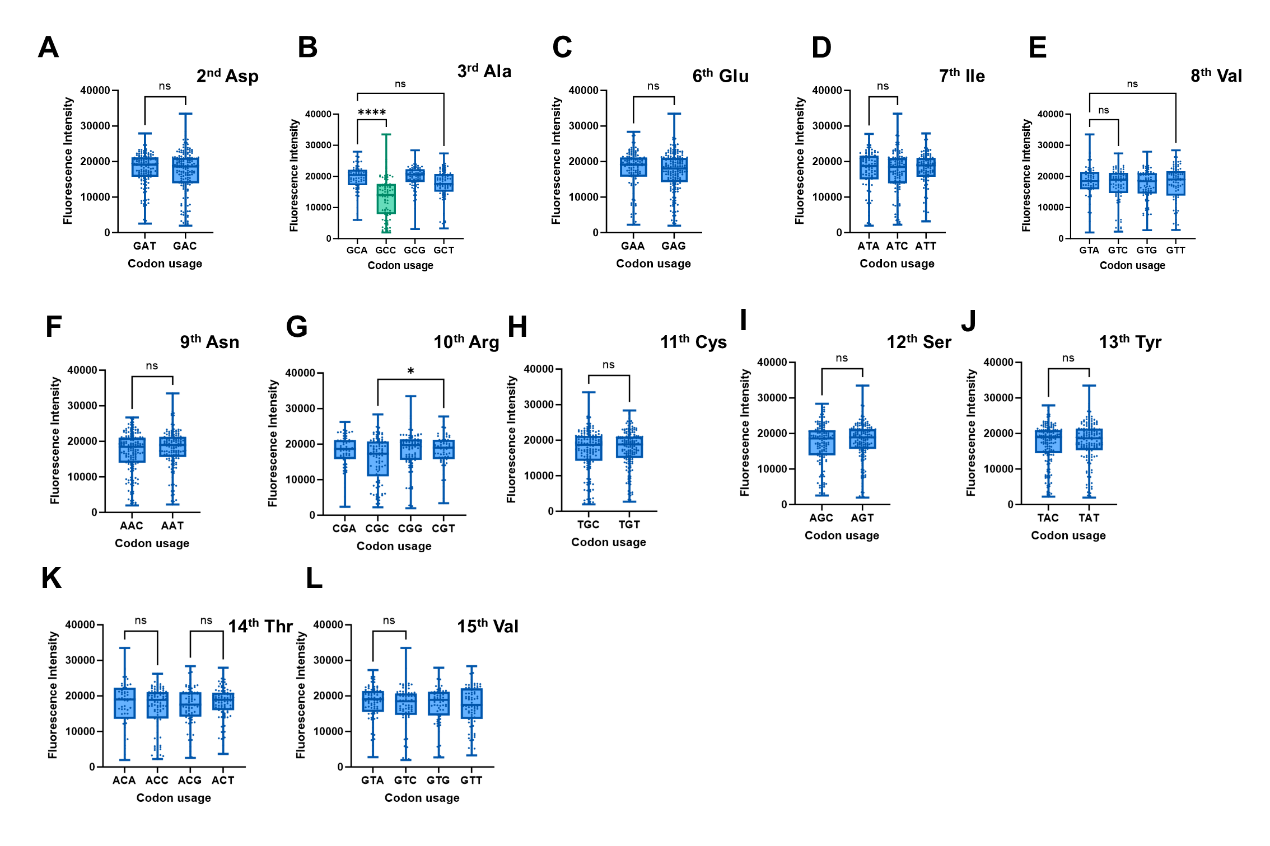


**Figure S7. Analysis of codon usage at various positions in the *Thaumatin* library.**
**(A)** Aspartic acid at position 2. **(B)** Alanine at position 3, with GCC identified as an NIC. **(C)** Glutamic acid at position 6. **(D)** Isoleucine at position 7. **(E)** Valine at position 8. **(F)** Asparagine at position 9. **(G)** Arginine at position 10, with CGC identified as an NIC. **(H)** Cysteine at position 11. **(I)** Serine at position 12. **(J)** Tyrosine at position 13. **(K)** Threonine at position 14. **(L)** Valine at position 15.


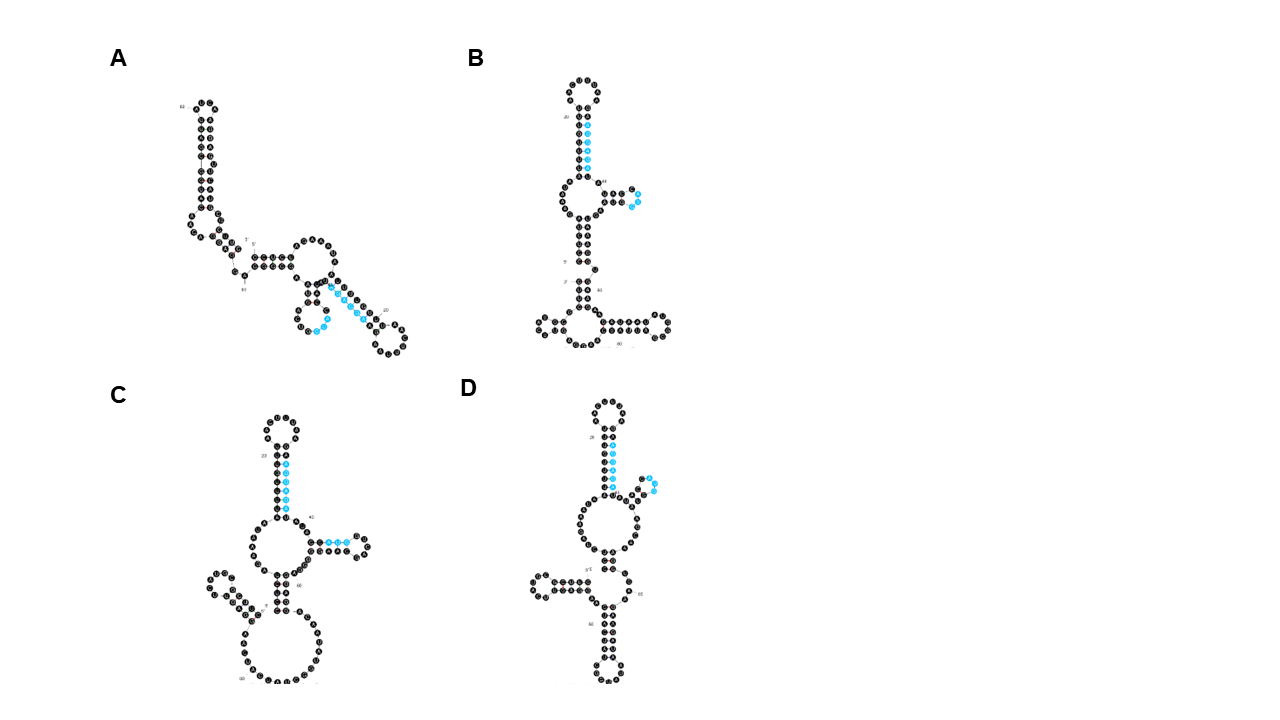


**Figure S8. Predicted secondary structures of the first 100 nt of mRNA sequences that exhibit significant differences in fluorescence intensity due to 5′-end sequence adjustments.** The RBS and start codon (ATG) are highlighted in blue. **(A)** *mCherry-A*, fluorescence intensity 5,574. The RBS is embedded in the stem of a hairpin structure, forming a double-stranded region, while the ATG is located in the loop of a small hairpin. **(B)** *mCherry-A7*, fluorescence intensity 34,239. The RBS remains positioned in the stem of a hairpin structure, forming a double-stranded region, while the ATG is located in the loop of a small hairpin. **(C)** *mCherry-B*, fluorescence intensity 5,741. The RBS is embedded in the stem of a hairpin structure, forming a double-stranded region, while the ATG is located in the stem of a small hairpin, forming a double-stranded region. **(D)** *mCherry-B7*, fluorescence intensity 34,051. The RBS is embedded in the stem of a hairpin structure, forming a double-stranded region, while the ATG is located in the loop of a small hairpin.


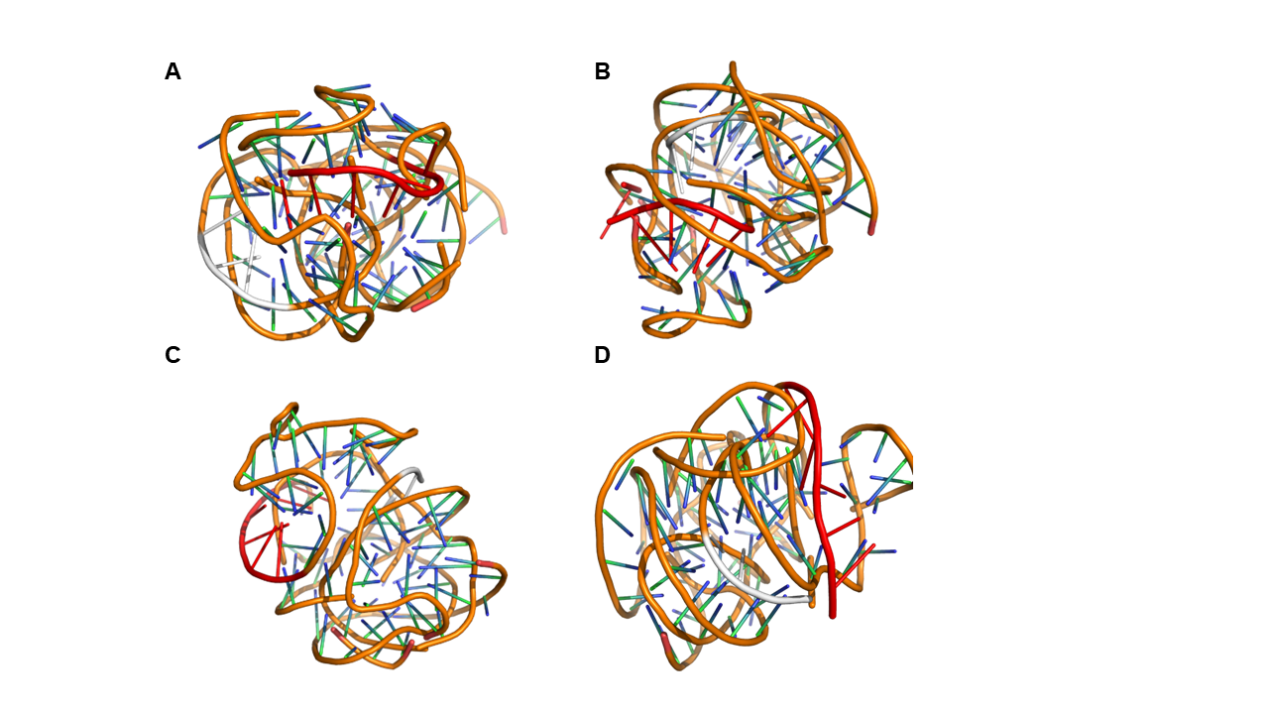


**Figure S9. Predicted tertiary structures (RhoFold) of the first 100 nt of mRNA sequences that exhibit significant differences in fluorescence intensity due to 5′-end sequence adjustments.** The RBS is highlighted in red and the start codon (ATG) in white. **(A)** *mCherry-A*, fluorescence intensity 5,574. **(B)** *mCherry-A7*, fluorescence intensity 34,239. **(C)** *mCherry-B*, fluorescence intensity 5,741. **(D)** *mCherry-B7* fluorescence intensity 34,051. Due to the highly dynamic nature of single-stranded mRNA, the tertiary structure predictions do not provide stable double-stranded regions; instead, the elements appear entangled within complex conformations.


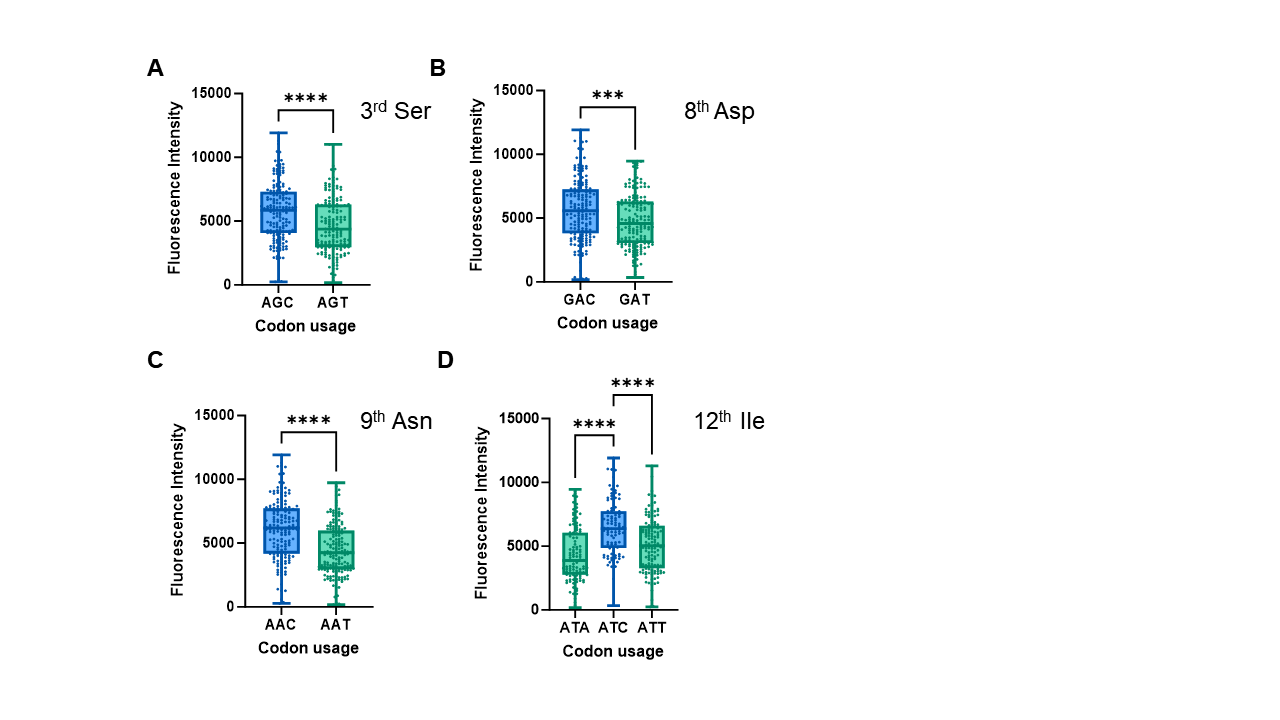


**Figure S10. Codon usage analysis of the *Rhodococcus.ruber* mCherry expression library revealed representative NICs.** (A) Serine at position 3, where AGT is identified as an NIC in *R.ruber*. (B) Aspartic acid at position 8, where GAT is an NIC. (C)Asparagine at position 9, where AAT is an NIC. (D) Isoleucine at position 12, where ATA and ATT are NICs. Notably, in *R.ruber*, all identified NICs end with G/C at the third codon position, in sharp contrast to the pattern observed in *E. coli*.


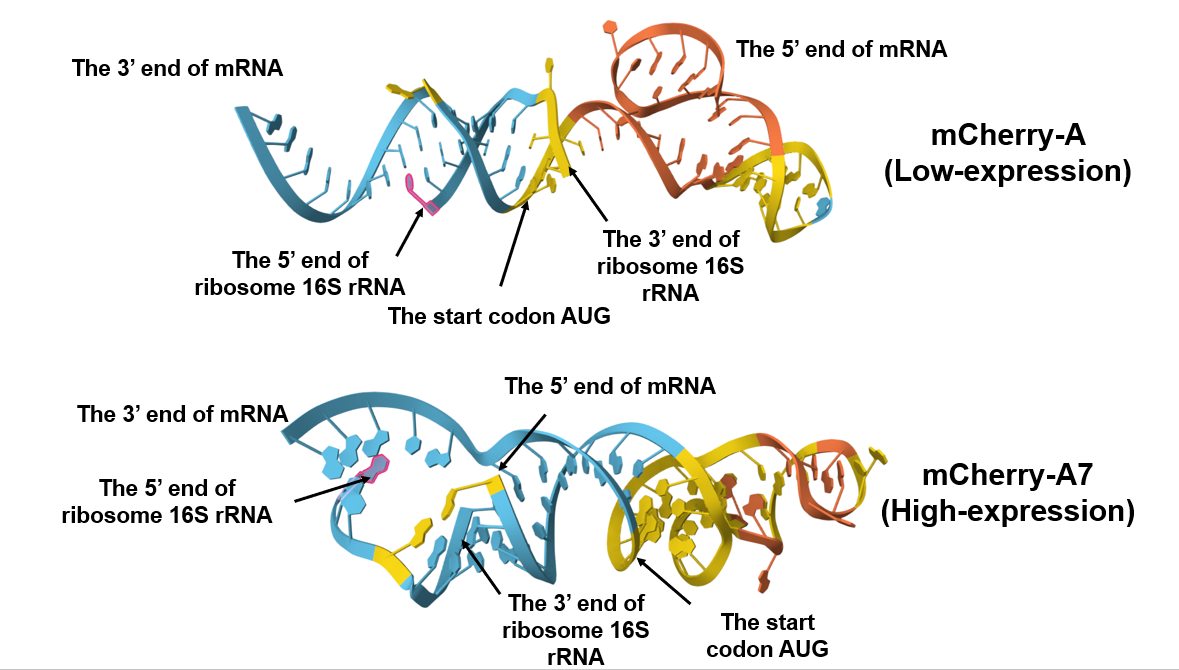


**Figure S11. Preliminary docking analysis of the interaction between the mRNA 5′ coding region and Escherichia coli 16S rRNA.** Docking models were generated using the +1 position–ATG downstream 18-nt fragments of the low-expression sequence mCherry-A and the high-expression sequence mCherry-A7. The 16S rRNA exhibited improved compatibility and putative recognition of the 5′ region of the high-expression mCherry-A7 mRNA compared with the NIC-containing mCherry-A, suggesting enhanced ribosomal engagement at the initiation stage.


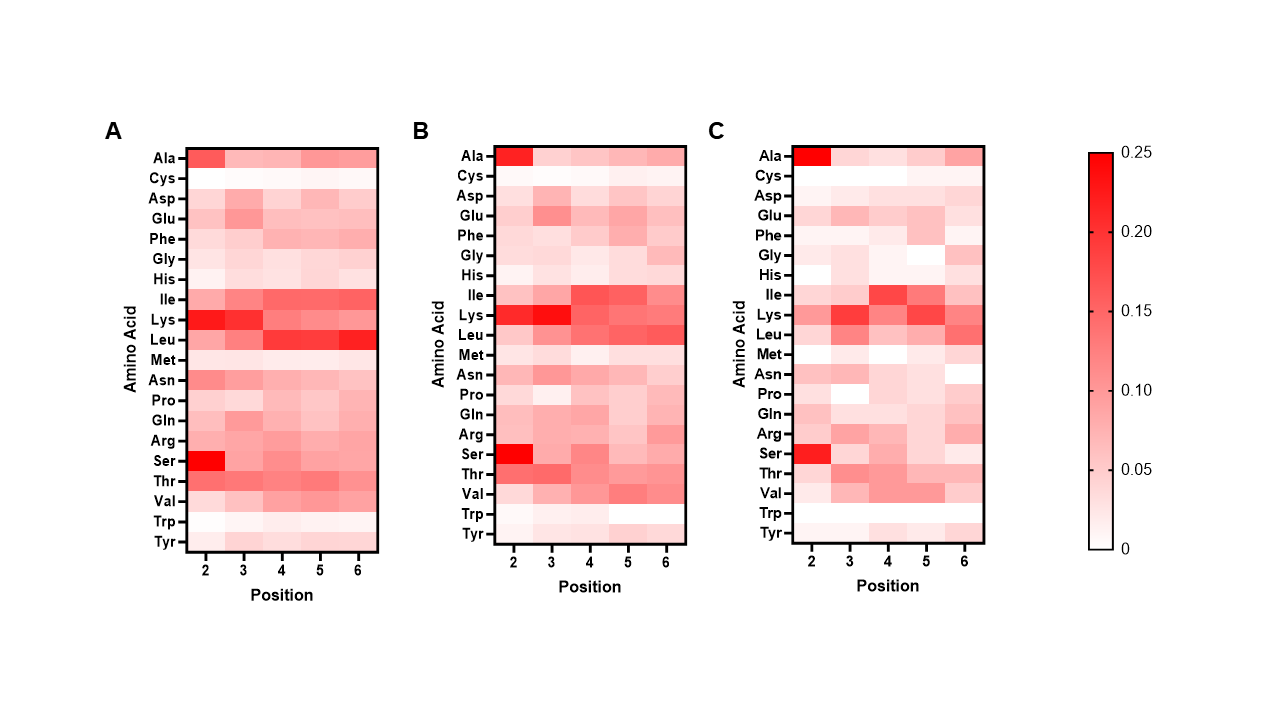


**Figure S12. Amino acid usage preferences at positions 2–6 in proteins of different abundance levels. (A)** All proteins detected in the proteome. **(B)** The top 500 most abundant proteins. **(C)** The top 100 most abundant proteins. Position 2 shows a preference for Ala and Ser, position 3 for Lys, and positions 4–6 exhibit preferences for Ile, Lys, and Leu.


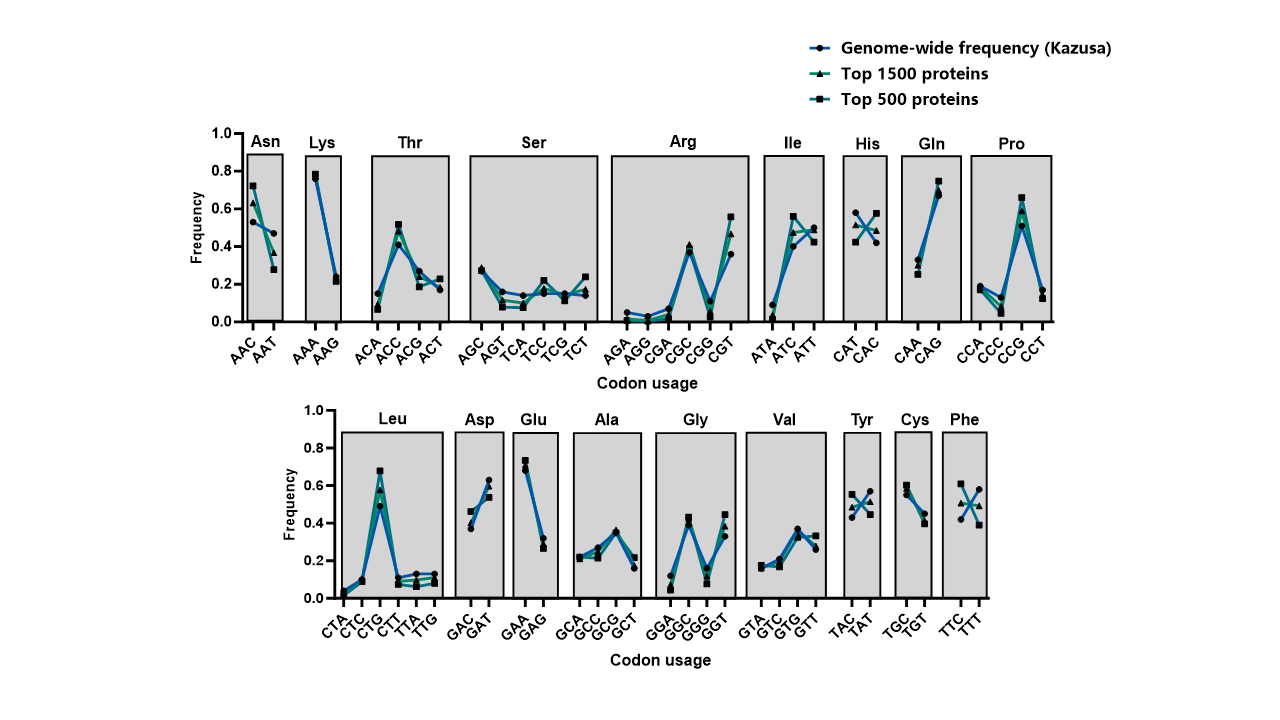


**Figure S13. Codon usage frequencies of individual amino acids in proteins of different abundance levels.** Blue dots and lines represent genome-wide frequencies from the Kazusa database, red represents frequencies in the top 1500 most abundant proteins, and green represents frequencies in the top 500 most abundant proteins. For most amino acids, codon usage shows no marked differences across protein abundance groups. However, the AAC codon for Asn, the CAT codon for His, the TAC codon for Tyr, and the TTC codon for Phe are significantly enriched in highly abundant proteins.


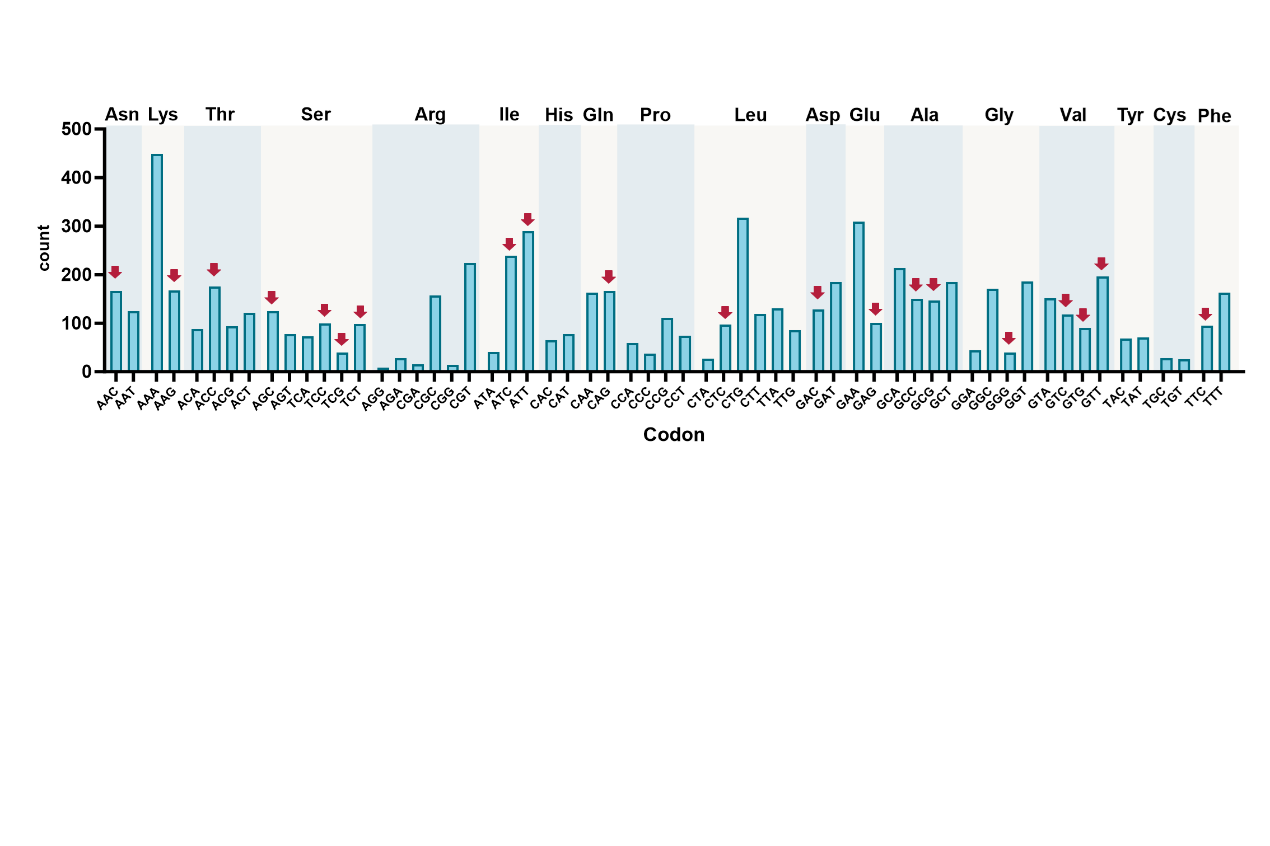


**Fig.S14** **Usage counts of each codon within the 5’ ends 48 bp of the top 500 high-abundance proteins.** NICs are highlighted with red arrows.


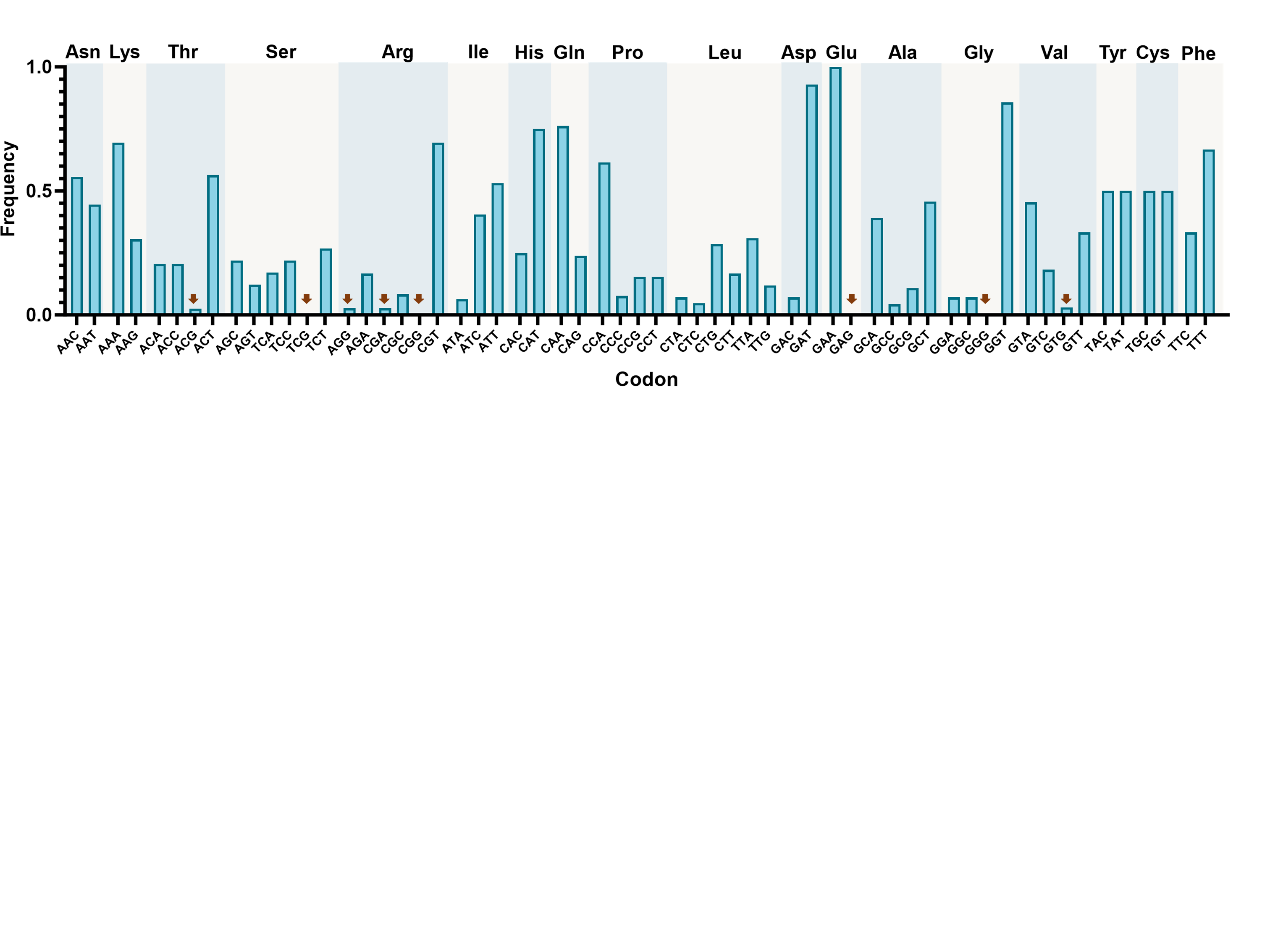


**Fig.S15 Codon usage frequencies within the first 18 bp of genes encoding the top 100 most abundant proteins.** Codon usage frequencies were calculated for the N-terminal core region (first 18 bp) of genes corresponding to the 100 most abundant proteins identified in the proteomic dataset. Codons highlighted by brown arrows—Thr-ACG, Ser-TCG, Arg-AGG/CGA/CGG, Glu-GAG, Gly-GGG, and Val-GTG—exhibit extremely low usage frequencies (below 5%), indicating strong depletion within this critical early elongation window.


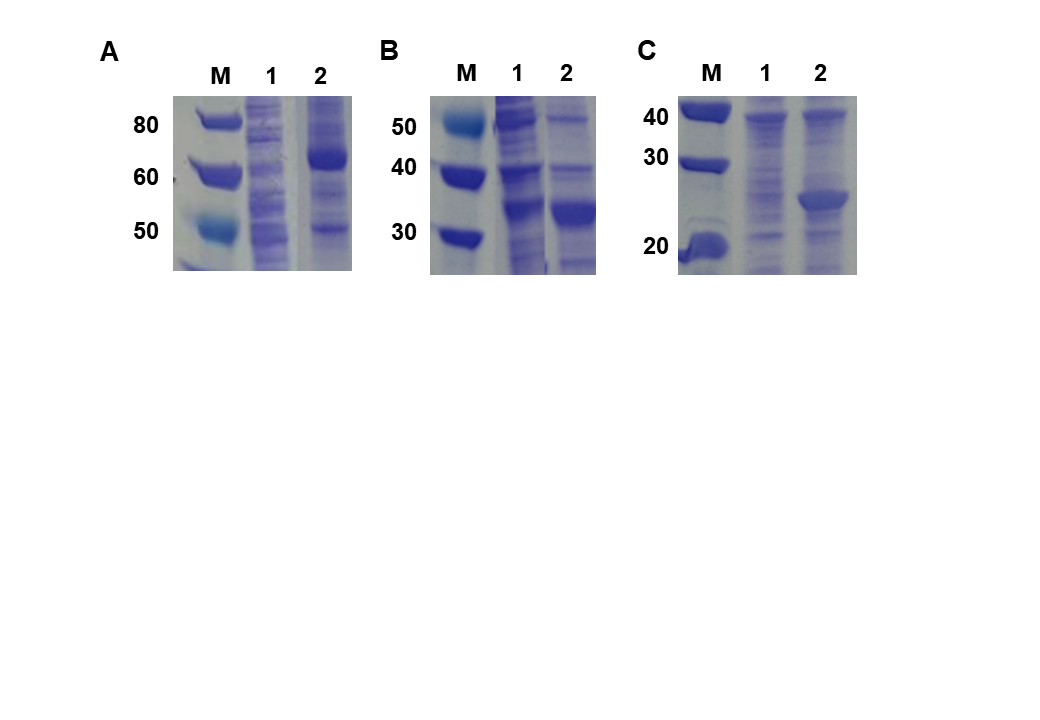


**Fig. S16 SDS–PAGE analysis of target proteins following selective replacement of core incompatible codons within the N-terminal 18 bp region (**A) Laccase. (B) Lipase. (C) Cysteine hydrolase. Lane M, molecular weight marker. Lane 1, native (wild-type) sequence. Lane 2, sequence in which only the core incompatible codons within the N-terminal 18 bp region were replaced

Table S1. The sequence and expression information of constructs shown in Figure 3

| Sequence name | Sequence | Fluorescence Intensity |
| --- | --- | --- |
| A | ATGGTCAGTAAGGGGGAGGAGGACAACATGGCGATTATCAAGGAGTTCATGCGCTTCAAGGTGCACATGGAGGGCTCCGTGAACGGCCACGAGTTCGAGATCGAGGGCGAGGGCGAGGGCCGCCCCTACGAGGGCACCCAGACCGCCAAGCTGAAGGTGACCAAGGGTGGCCCCCTGCCCTTCGCCTGGGACATCCTGTCCCCTCAGTTCATGTACGGCTCCAAGGCCTACGTGAAGCACCCCGCCGACATCCCCGACTACTTGAAGCTGTCCTTCCCCGAGGGCTTCAAGTGGGAGCGCGTGATGAACTTCGAGGACGGCGGCGTGGTGACCGTGACCCAGGACTCCTCCCTGCAGGACGGCGAGTTCATCTACAAGGTGAAGCTGCGCGGCACCAACTTCCCCTCCGACGGCCCCGTAATGCAGAAGAAGACGATGGGCTGGGAGGCCTCCTCCGAGCGGATGTACCCCGAGGACGGCGCCCTGAAGGGCGAGATCAAGCAGAGGCTGAAGCTGAAGGACGGCGGCCACTACGACGCTGAGGTCAAGACCACCTACAAGGCCAAGAAGCCCGTGCAGCTGCCCGGCGCCTACAACGTCAACATCAAGTTGGACATCACCTCCCACAACGAGGACTACACCATCGTGGAACAGTACGAACGCGCCGAGGGCCGCCACTCCACCGGCGGCATGGACGAGCTGTACAAGTGA | 5741 |
| A-1 | ATGGTAAGTAAGGGGGAGGAGGACAACATGGCGATTATCAAGGAGTTCATGCGCTTCAAGGTGCACATGGAGGGCTCCGTGAACGGCCACGAGTTCGAGATCGAGGGCGAGGGCGAGGGCCGCCCCTACGAGGGCACCCAGACCGCCAAGCTGAAGGTGACCAAGGGTGGCCCCCTGCCCTTCGCCTGGGACATCCTGTCCCCTCAGTTCATGTACGGCTCCAAGGCCTACGTGAAGCACCCCGCCGACATCCCCGACTACTTGAAGCTGTCCTTCCCCGAGGGCTTCAAGTGGGAGCGCGTGATGAACTTCGAGGACGGCGGCGTGGTGACCGTGACCCAGGACTCCTCCCTGCAGGACGGCGAGTTCATCTACAAGGTGAAGCTGCGCGGCACCAACTTCCCCTCCGACGGCCCCGTAATGCAGAAGAAGACGATGGGCTGGGAGGCCTCCTCCGAGCGGATGTACCCCGAGGACGGCGCCCTGAAGGGCGAGATCAAGCAGAGGCTGAAGCTGAAGGACGGCGGCCACTACGACGCTGAGGTCAAGACCACCTACAAGGCCAAGAAGCCCGTGCAGCTGCCCGGCGCCTACAACGTCAACATCAAGTTGGACATCACCTCCCACAACGAGGACTACACCATCGTGGAACAGTACGAACGCGCCGAGGGCCGCCACTCCACCGGCGGCATGGACGAGCTGTACAAGTGA | 10990 |
| A-2 | ATGGTCAGTAAAGGGGAGGAGGACAACATGGCGATTATCAAGGAGTTCATGCGCTTCAAGGTGCACATGGAGGGCTCCGTGAACGGCCACGAGTTCGAGATCGAGGGCGAGGGCGAGGGCCGCCCCTACGAGGGCACCCAGACCGCCAAGCTGAAGGTGACCAAGGGTGGCCCCCTGCCCTTCGCCTGGGACATCCTGTCCCCTCAGTTCATGTACGGCTCCAAGGCCTACGTGAAGCACCCCGCCGACATCCCCGACTACTTGAAGCTGTCCTTCCCCGAGGGCTTCAAGTGGGAGCGCGTGATGAACTTCGAGGACGGCGGCGTGGTGACCGTGACCCAGGACTCCTCCCTGCAGGACGGCGAGTTCATCTACAAGGTGAAGCTGCGCGGCACCAACTTCCCCTCCGACGGCCCCGTAATGCAGAAGAAGACGATGGGCTGGGAGGCCTCCTCCGAGCGGATGTACCCCGAGGACGGCGCCCTGAAGGGCGAGATCAAGCAGAGGCTGAAGCTGAAGGACGGCGGCCACTACGACGCTGAGGTCAAGACCACCTACAAGGCCAAGAAGCCCGTGCAGCTGCCCGGCGCCTACAACGTCAACATCAAGTTGGACATCACCTCCCACAACGAGGACTACACCATCGTGGAACAGTACGAACGCGCCGAGGGCCGCCACTCCACCGGCGGCATGGACGAGCTGTACAAGTGA | 16161 |
| A-3 | ATGGTCAGTAAGGGGGAAGAGGACAACATGGCGATTATCAAGGAGTTCATGCGCTTCAAGGTGCACATGGAGGGCTCCGTGAACGGCCACGAGTTCGAGATCGAGGGCGAGGGCGAGGGCCGCCCCTACGAGGGCACCCAGACCGCCAAGCTGAAGGTGACCAAGGGTGGCCCCCTGCCCTTCGCCTGGGACATCCTGTCCCCTCAGTTCATGTACGGCTCCAAGGCCTACGTGAAGCACCCCGCCGACATCCCCGACTACTTGAAGCTGTCCTTCCCCGAGGGCTTCAAGTGGGAGCGCGTGATGAACTTCGAGGACGGCGGCGTGGTGACCGTGACCCAGGACTCCTCCCTGCAGGACGGCGAGTTCATCTACAAGGTGAAGCTGCGCGGCACCAACTTCCCCTCCGACGGCCCCGTAATGCAGAAGAAGACGATGGGCTGGGAGGCCTCCTCCGAGCGGATGTACCCCGAGGACGGCGCCCTGAAGGGCGAGATCAAGCAGAGGCTGAAGCTGAAGGACGGCGGCCACTACGACGCTGAGGTCAAGACCACCTACAAGGCCAAGAAGCCCGTGCAGCTGCCCGGCGCCTACAACGTCAACATCAAGTTGGACATCACCTCCCACAACGAGGACTACACCATCGTGGAACAGTACGAACGCGCCGAGGGCCGCCACTCCACCGGCGGCATGGACGAGCTGTACAAGTGA | 14087 |
| A-4 | ATGGTCAGTAAGGGGGAGGAAGACAACATGGCGATTATCAAGGAGTTCATGCGCTTCAAGGTGCACATGGAGGGCTCCGTGAACGGCCACGAGTTCGAGATCGAGGGCGAGGGCGAGGGCCGCCCCTACGAGGGCACCCAGACCGCCAAGCTGAAGGTGACCAAGGGTGGCCCCCTGCCCTTCGCCTGGGACATCCTGTCCCCTCAGTTCATGTACGGCTCCAAGGCCTACGTGAAGCACCCCGCCGACATCCCCGACTACTTGAAGCTGTCCTTCCCCGAGGGCTTCAAGTGGGAGCGCGTGATGAACTTCGAGGACGGCGGCGTGGTGACCGTGACCCAGGACTCCTCCCTGCAGGACGGCGAGTTCATCTACAAGGTGAAGCTGCGCGGCACCAACTTCCCCTCCGACGGCCCCGTAATGCAGAAGAAGACGATGGGCTGGGAGGCCTCCTCCGAGCGGATGTACCCCGAGGACGGCGCCCTGAAGGGCGAGATCAAGCAGAGGCTGAAGCTGAAGGACGGCGGCCACTACGACGCTGAGGTCAAGACCACCTACAAGGCCAAGAAGCCCGTGCAGCTGCCCGGCGCCTACAACGTCAACATCAAGTTGGACATCACCTCCCACAACGAGGACTACACCATCGTGGAACAGTACGAACGCGCCGAGGGCCGCCACTCCACCGGCGGCATGGACGAGCTGTACAAGTGA | 13488 |
| A-5 | ATGGTCAGTAAGGGGGAGGAGGATAACATGGCGATTATCAAGGAGTTCATGCGCTTCAAGGTGCACATGGAGGGCTCCGTGAACGGCCACGAGTTCGAGATCGAGGGCGAGGGCGAGGGCCGCCCCTACGAGGGCACCCAGACCGCCAAGCTGAAGGTGACCAAGGGTGGCCCCCTGCCCTTCGCCTGGGACATCCTGTCCCCTCAGTTCATGTACGGCTCCAAGGCCTACGTGAAGCACCCCGCCGACATCCCCGACTACTTGAAGCTGTCCTTCCCCGAGGGCTTCAAGTGGGAGCGCGTGATGAACTTCGAGGACGGCGGCGTGGTGACCGTGACCCAGGACTCCTCCCTGCAGGACGGCGAGTTCATCTACAAGGTGAAGCTGCGCGGCACCAACTTCCCCTCCGACGGCCCCGTAATGCAGAAGAAGACGATGGGCTGGGAGGCCTCCTCCGAGCGGATGTACCCCGAGGACGGCGCCCTGAAGGGCGAGATCAAGCAGAGGCTGAAGCTGAAGGACGGCGGCCACTACGACGCTGAGGTCAAGACCACCTACAAGGCCAAGAAGCCCGTGCAGCTGCCCGGCGCCTACAACGTCAACATCAAGTTGGACATCACCTCCCACAACGAGGACTACACCATCGTGGAACAGTACGAACGCGCCGAGGGCCGCCACTCCACCGGCGGCATGGACGAGCTGTACAAGTGA | 13098 |
| A-6 | ATGGTCAGTAAGGGGGAGGAGGACAATATGGCGATTATCAAGGAGTTCATGCGCTTCAAGGTGCACATGGAGGGCTCCGTGAACGGCCACGAGTTCGAGATCGAGGGCGAGGGCGAGGGCCGCCCCTACGAGGGCACCCAGACCGCCAAGCTGAAGGTGACCAAGGGTGGCCCCCTGCCCTTCGCCTGGGACATCCTGTCCCCTCAGTTCATGTACGGCTCCAAGGCCTACGTGAAGCACCCCGCCGACATCCCCGACTACTTGAAGCTGTCCTTCCCCGAGGGCTTCAAGTGGGAGCGCGTGATGAACTTCGAGGACGGCGGCGTGGTGACCGTGACCCAGGACTCCTCCCTGCAGGACGGCGAGTTCATCTACAAGGTGAAGCTGCGCGGCACCAACTTCCCCTCCGACGGCCCCGTAATGCAGAAGAAGACGATGGGCTGGGAGGCCTCCTCCGAGCGGATGTACCCCGAGGACGGCGCCCTGAAGGGCGAGATCAAGCAGAGGCTGAAGCTGAAGGACGGCGGCCACTACGACGCTGAGGTCAAGACCACCTACAAGGCCAAGAAGCCCGTGCAGCTGCCCGGCGCCTACAACGTCAACATCAAGTTGGACATCACCTCCCACAACGAGGACTACACCATCGTGGAACAGTACGAACGCGCCGAGGGCCGCCACTCCACCGGCGGCATGGACGAGCTGTACAAGTGA | 11776 |
| A-7 | ATGGTAAGTAAAGGTGAAGAAGATAATATGGCGATTATCAAGGAGTTCATGCGCTTCAAGGTGCACATGGAGGGCTCCGTGAACGGCCACGAGTTCGAGATCGAGGGCGAGGGCGAGGGCCGCCCCTACGAGGGCACCCAGACCGCCAAGCTGAAGGTGACCAAGGGTGGCCCCCTGCCCTTCGCCTGGGACATCCTGTCCCCTCAGTTCATGTACGGCTCCAAGGCCTACGTGAAGCACCCCGCCGACATCCCCGACTACTTGAAGCTGTCCTTCCCCGAGGGCTTCAAGTGGGAGCGCGTGATGAACTTCGAGGACGGCGGCGTGGTGACCGTGACCCAGGACTCCTCCCTGCAGGACGGCGAGTTCATCTACAAGGTGAAGCTGCGCGGCACCAACTTCCCCTCCGACGGCCCCGTAATGCAGAAGAAGACGATGGGCTGGGAGGCCTCCTCCGAGCGGATGTACCCCGAGGACGGCGCCCTGAAGGGCGAGATCAAGCAGAGGCTGAAGCTGAAGGACGGCGGCCACTACGACGCTGAGGTCAAGACCACCTACAAGGCCAAGAAGCCCGTGCAGCTGCCCGGCGCCTACAACGTCAACATCAAGTTGGACATCACCTCCCACAACGAGGACTACACCATCGTGGAACAGTACGAACGCGCCGAGGGCCGCCACTCCACCGGCGGCATGGACGAGCTGTACAAGTGA | 34050 |
| B | ATGGTCAGCAAGGGGGAGGAGGACAATATGGCTATCATCAAGGAGTTCATGCGCTTCAAGGTGCACATGGAGGGCTCCGTGAACGGCCACGAGTTCGAGATCGAGGGCGAGGGCGAGGGCCGCCCCTACGAGGGCACCCAGACCGCCAAGCTGAAGGTGACCAAGGGTGGCCCCCTGCCCTTCGCCTGGGACATCCTGTCCCCTCAGTTCATGTACGGCTCCAAGGCCTACGTGAAGCACCCCGCCGACATCCCCGACTACTTGAAGCTGTCCTTCCCCGAGGGCTTCAAGTGGGAGCGCGTGATGAACTTCGAGGACGGCGGCGTGGTGACCGTGACCCAGGACTCCTCCCTGCAGGACGGCGAGTTCATCTACAAGGTGAAGCTGCGCGGCACCAACTTCCCCTCCGACGGCCCCGTAATGCAGAAGAAGACGATGGGCTGGGAGGCCTCCTCCGAGCGGATGTACCCCGAGGACGGCGCCCTGAAGGGCGAGATCAAGCAGAGGCTGAAGCTGAAGGACGGCGGCCACTACGACGCTGAGGTCAAGACCACCTACAAGGCCAAGAAGCCCGTGCAGCTGCCCGGCGCCTACAACGTCAACATCAAGTTGGACATCACCTCCCACAACGAGGACTACACCATCGTGGAACAGTACGAACGCGCCGAGGGCCGCCACTCCACCGGCGGCATGGACGAGCTGTACAAGTGA | 5574 |
| B-1 | ATGGTAAGCAAGGGGGAGGAGGACAATATGGCTATCATCAAGGAGTTCATGCGCTTCAAGGTGCACATGGAGGGCTCCGTGAACGGCCACGAGTTCGAGATCGAGGGCGAGGGCGAGGGCCGCCCCTACGAGGGCACCCAGACCGCCAAGCTGAAGGTGACCAAGGGTGGCCCCCTGCCCTTCGCCTGGGACATCCTGTCCCCTCAGTTCATGTACGGCTCCAAGGCCTACGTGAAGCACCCCGCCGACATCCCCGACTACTTGAAGCTGTCCTTCCCCGAGGGCTTCAAGTGGGAGCGCGTGATGAACTTCGAGGACGGCGGCGTGGTGACCGTGACCCAGGACTCCTCCCTGCAGGACGGCGAGTTCATCTACAAGGTGAAGCTGCGCGGCACCAACTTCCCCTCCGACGGCCCCGTAATGCAGAAGAAGACGATGGGCTGGGAGGCCTCCTCCGAGCGGATGTACCCCGAGGACGGCGCCCTGAAGGGCGAGATCAAGCAGAGGCTGAAGCTGAAGGACGGCGGCCACTACGACGCTGAGGTCAAGACCACCTACAAGGCCAAGAAGCCCGTGCAGCTGCCCGGCGCCTACAACGTCAACATCAAGTTGGACATCACCTCCCACAACGAGGACTACACCATCGTGGAACAGTACGAACGCGCCGAGGGCCGCCACTCCACCGGCGGCATGGACGAGCTGTACAAGTGA | 11624 |
| B-2 | ATGGTCAGCAAAGGGGAGGAGGACAATATGGCTATCATCAAGGAGTTCATGCGCTTCAAGGTGCACATGGAGGGCTCCGTGAACGGCCACGAGTTCGAGATCGAGGGCGAGGGCGAGGGCCGCCCCTACGAGGGCACCCAGACCGCCAAGCTGAAGGTGACCAAGGGTGGCCCCCTGCCCTTCGCCTGGGACATCCTGTCCCCTCAGTTCATGTACGGCTCCAAGGCCTACGTGAAGCACCCCGCCGACATCCCCGACTACTTGAAGCTGTCCTTCCCCGAGGGCTTCAAGTGGGAGCGCGTGATGAACTTCGAGGACGGCGGCGTGGTGACCGTGACCCAGGACTCCTCCCTGCAGGACGGCGAGTTCATCTACAAGGTGAAGCTGCGCGGCACCAACTTCCCCTCCGACGGCCCCGTAATGCAGAAGAAGACGATGGGCTGGGAGGCCTCCTCCGAGCGGATGTACCCCGAGGACGGCGCCCTGAAGGGCGAGATCAAGCAGAGGCTGAAGCTGAAGGACGGCGGCCACTACGACGCTGAGGTCAAGACCACCTACAAGGCCAAGAAGCCCGTGCAGCTGCCCGGCGCCTACAACGTCAACATCAAGTTGGACATCACCTCCCACAACGAGGACTACACCATCGTGGAACAGTACGAACGCGCCGAGGGCCGCCACTCCACCGGCGGCATGGACGAGCTGTACAAGTGA | 16683 |
| B-3 | ATGGTCAGCAAGGGTGAGGAGGACAATATGGCTATCATCAAGGAGTTCATGCGCTTCAAGGTGCACATGGAGGGCTCCGTGAACGGCCACGAGTTCGAGATCGAGGGCGAGGGCGAGGGCCGCCCCTACGAGGGCACCCAGACCGCCAAGCTGAAGGTGACCAAGGGTGGCCCCCTGCCCTTCGCCTGGGACATCCTGTCCCCTCAGTTCATGTACGGCTCCAAGGCCTACGTGAAGCACCCCGCCGACATCCCCGACTACTTGAAGCTGTCCTTCCCCGAGGGCTTCAAGTGGGAGCGCGTGATGAACTTCGAGGACGGCGGCGTGGTGACCGTGACCCAGGACTCCTCCCTGCAGGACGGCGAGTTCATCTACAAGGTGAAGCTGCGCGGCACCAACTTCCCCTCCGACGGCCCCGTAATGCAGAAGAAGACGATGGGCTGGGAGGCCTCCTCCGAGCGGATGTACCCCGAGGACGGCGCCCTGAAGGGCGAGATCAAGCAGAGGCTGAAGCTGAAGGACGGCGGCCACTACGACGCTGAGGTCAAGACCACCTACAAGGCCAAGAAGCCCGTGCAGCTGCCCGGCGCCTACAACGTCAACATCAAGTTGGACATCACCTCCCACAACGAGGACTACACCATCGTGGAACAGTACGAACGCGCCGAGGGCCGCCACTCCACCGGCGGCATGGACGAGCTGTACAAGTGA | 15865 |
| B-4 | ATGGTCAGCAAGGGGGAAGAGGACAATATGGCTATCATCAAGGAGTTCATGCGCTTCAAGGTGCACATGGAGGGCTCCGTGAACGGCCACGAGTTCGAGATCGAGGGCGAGGGCGAGGGCCGCCCCTACGAGGGCACCCAGACCGCCAAGCTGAAGGTGACCAAGGGTGGCCCCCTGCCCTTCGCCTGGGACATCCTGTCCCCTCAGTTCATGTACGGCTCCAAGGCCTACGTGAAGCACCCCGCCGACATCCCCGACTACTTGAAGCTGTCCTTCCCCGAGGGCTTCAAGTGGGAGCGCGTGATGAACTTCGAGGACGGCGGCGTGGTGACCGTGACCCAGGACTCCTCCCTGCAGGACGGCGAGTTCATCTACAAGGTGAAGCTGCGCGGCACCAACTTCCCCTCCGACGGCCCCGTAATGCAGAAGAAGACGATGGGCTGGGAGGCCTCCTCCGAGCGGATGTACCCCGAGGACGGCGCCCTGAAGGGCGAGATCAAGCAGAGGCTGAAGCTGAAGGACGGCGGCCACTACGACGCTGAGGTCAAGACCACCTACAAGGCCAAGAAGCCCGTGCAGCTGCCCGGCGCCTACAACGTCAACATCAAGTTGGACATCACCTCCCACAACGAGGACTACACCATCGTGGAACAGTACGAACGCGCCGAGGGCCGCCACTCCACCGGCGGCATGGACGAGCTGTACAAGTGA | 13047 |
| B-5 | ATGGTCAGCAAGGGGGAGGAAGACAATATGGCTATCATCAAGGAGTTCATGCGCTTCAAGGTGCACATGGAGGGCTCCGTGAACGGCCACGAGTTCGAGATCGAGGGCGAGGGCGAGGGCCGCCCCTACGAGGGCACCCAGACCGCCAAGCTGAAGGTGACCAAGGGTGGCCCCCTGCCCTTCGCCTGGGACATCCTGTCCCCTCAGTTCATGTACGGCTCCAAGGCCTACGTGAAGCACCCCGCCGACATCCCCGACTACTTGAAGCTGTCCTTCCCCGAGGGCTTCAAGTGGGAGCGCGTGATGAACTTCGAGGACGGCGGCGTGGTGACCGTGACCCAGGACTCCTCCCTGCAGGACGGCGAGTTCATCTACAAGGTGAAGCTGCGCGGCACCAACTTCCCCTCCGACGGCCCCGTAATGCAGAAGAAGACGATGGGCTGGGAGGCCTCCTCCGAGCGGATGTACCCCGAGGACGGCGCCCTGAAGGGCGAGATCAAGCAGAGGCTGAAGCTGAAGGACGGCGGCCACTACGACGCTGAGGTCAAGACCACCTACAAGGCCAAGAAGCCCGTGCAGCTGCCCGGCGCCTACAACGTCAACATCAAGTTGGACATCACCTCCCACAACGAGGACTACACCATCGTGGAACAGTACGAACGCGCCGAGGGCCGCCACTCCACCGGCGGCATGGACGAGCTGTACAAGTGA | 19888 |
| B-6 | ATGGTCAGCAAGGGGGAGGAGGATAATATGGCTATCATCAAGGAGTTCATGCGCTTCAAGGTGCACATGGAGGGCTCCGTGAACGGCCACGAGTTCGAGATCGAGGGCGAGGGCGAGGGCCGCCCCTACGAGGGCACCCAGACCGCCAAGCTGAAGGTGACCAAGGGTGGCCCCCTGCCCTTCGCCTGGGACATCCTGTCCCCTCAGTTCATGTACGGCTCCAAGGCCTACGTGAAGCACCCCGCCGACATCCCCGACTACTTGAAGCTGTCCTTCCCCGAGGGCTTCAAGTGGGAGCGCGTGATGAACTTCGAGGACGGCGGCGTGGTGACCGTGACCCAGGACTCCTCCCTGCAGGACGGCGAGTTCATCTACAAGGTGAAGCTGCGCGGCACCAACTTCCCCTCCGACGGCCCCGTAATGCAGAAGAAGACGATGGGCTGGGAGGCCTCCTCCGAGCGGATGTACCCCGAGGACGGCGCCCTGAAGGGCGAGATCAAGCAGAGGCTGAAGCTGAAGGACGGCGGCCACTACGACGCTGAGGTCAAGACCACCTACAAGGCCAAGAAGCCCGTGCAGCTGCCCGGCGCCTACAACGTCAACATCAAGTTGGACATCACCTCCCACAACGAGGACTACACCATCGTGGAACAGTACGAACGCGCCGAGGGCCGCCACTCCACCGGCGGCATGGACGAGCTGTACAAGTGA | 14495 |
| B-7 | ATGGTAAGCAAAGGTGAAGAAGATAATATGGCTATCATCAAGGAGTTCATGCGCTTCAAGGTGCACATGGAGGGCTCCGTGAACGGCCACGAGTTCGAGATCGAGGGCGAGGGCGAGGGCCGCCCCTACGAGGGCACCCAGACCGCCAAGCTGAAGGTGACCAAGGGTGGCCCCCTGCCCTTCGCCTGGGACATCCTGTCCCCTCAGTTCATGTACGGCTCCAAGGCCTACGTGAAGCACCCCGCCGACATCCCCGACTACTTGAAGCTGTCCTTCCCCGAGGGCTTCAAGTGGGAGCGCGTGATGAACTTCGAGGACGGCGGCGTGGTGACCGTGACCCAGGACTCCTCCCTGCAGGACGGCGAGTTCATCTACAAGGTGAAGCTGCGCGGCACCAACTTCCCCTCCGACGGCCCCGTAATGCAGAAGAAGACGATGGGCTGGGAGGCCTCCTCCGAGCGGATGTACCCCGAGGACGGCGCCCTGAAGGGCGAGATCAAGCAGAGGCTGAAGCTGAAGGACGGCGGCCACTACGACGCTGAGGTCAAGACCACCTACAAGGCCAAGAAGCCCGTGCAGCTGCCCGGCGCCTACAACGTCAACATCAAGTTGGACATCACCTCCCACAACGAGGACTACACCATCGTGGAACAGTACGAACGCGCCGAGGGCCGCCACTCCACCGGCGGCATGGACGAGCTGTACAAGTGA | 34239 |
| C | ATGGTCAGTAAGGGGGAAGAGGACAATATGGCCATCATTAAAGAGTTCATGCGCTTCAAGGTGCACATGGAGGGCTCCGTGAACGGCCACGAGTTCGAGATCGAGGGCGAGGGCGAGGGCCGCCCCTACGAGGGCACCCAGACCGCCAAGCTGAAGGTGACCAAGGGTGGCCCCCTGCCCTTCGCCTGGGACATCCTGTCCCCTCAGTTCATGTACGGCTCCAAGGCCTACGTGAAGCACCCCGCCGACATCCCCGACTACTTGAAGCTGTCCTTCCCCGAGGGCTTCAAGTGGGAGCGCGTGATGAACTTCGAGGACGGCGGCGTGGTGACCGTGACCCAGGACTCCTCCCTGCAGGACGGCGAGTTCATCTACAAGGTGAAGCTGCGCGGCACCAACTTCCCCTCCGACGGCCCCGTAATGCAGAAGAAGACGATGGGCTGGGAGGCCTCCTCCGAGCGGATGTACCCCGAGGACGGCGCCCTGAAGGGCGAGATCAAGCAGAGGCTGAAGCTGAAGGACGGCGGCCACTACGACGCTGAGGTCAAGACCACCTACAAGGCCAAGAAGCCCGTGCAGCTGCCCGGCGCCTACAACGTCAACATCAAGTTGGACATCACCTCCCACAACGAGGACTACACCATCGTGGAACAGTACGAACGCGCCGAGGGCCGCCACTCCACCGGCGGCATGGACGAGCTGTACAAGTGA | 11499 |
| C-R | ATGGTAAGTAAAGGTGAAGAAGATAATATGGCAATCATTAAAGAGTTCATGCGCTTCAAGGTGCACATGGAGGGCTCCGTGAACGGCCACGAGTTCGAGATCGAGGGCGAGGGCGAGGGCCGCCCCTACGAGGGCACCCAGACCGCCAAGCTGAAGGTGACCAAGGGTGGCCCCCTGCCCTTCGCCTGGGACATCCTGTCCCCTCAGTTCATGTACGGCTCCAAGGCCTACGTGAAGCACCCCGCCGACATCCCCGACTACTTGAAGCTGTCCTTCCCCGAGGGCTTCAAGTGGGAGCGCGTGATGAACTTCGAGGACGGCGGCGTGGTGACCGTGACCCAGGACTCCTCCCTGCAGGACGGCGAGTTCATCTACAAGGTGAAGCTGCGCGGCACCAACTTCCCCTCCGACGGCCCCGTAATGCAGAAGAAGACGATGGGCTGGGAGGCCTCCTCCGAGCGGATGTACCCCGAGGACGGCGCCCTGAAGGGCGAGATCAAGCAGAGGCTGAAGCTGAAGGACGGCGGCCACTACGACGCTGAGGTCAAGACCACCTACAAGGCCAAGAAGCCCGTGCAGCTGCCCGGCGCCTACAACGTCAACATCAAGTTGGACATCACCTCCCACAACGAGGACTACACCATCGTGGAACAGTACGAACGCGCCGAGGGCCGCCACTCCACCGGCGGCATGGACGAGCTGTACAAGTGA | 33335 |
| D | ATGGTTAGCAAGGGGGAGGAGGATAACATGGCTATCATTAAGGAGTTCATGCGCTTCAAGGTGCACATGGAGGGCTCCGTGAACGGCCACGAGTTCGAGATCGAGGGCGAGGGCGAGGGCCGCCCCTACGAGGGCACCCAGACCGCCAAGCTGAAGGTGACCAAGGGTGGCCCCCTGCCCTTCGCCTGGGACATCCTGTCCCCTCAGTTCATGTACGGCTCCAAGGCCTACGTGAAGCACCCCGCCGACATCCCCGACTACTTGAAGCTGTCCTTCCCCGAGGGCTTCAAGTGGGAGCGCGTGATGAACTTCGAGGACGGCGGCGTGGTGACCGTGACCCAGGACTCCTCCCTGCAGGACGGCGAGTTCATCTACAAGGTGAAGCTGCGCGGCACCAACTTCCCCTCCGACGGCCCCGTAATGCAGAAGAAGACGATGGGCTGGGAGGCCTCCTCCGAGCGGATGTACCCCGAGGACGGCGCCCTGAAGGGCGAGATCAAGCAGAGGCTGAAGCTGAAGGACGGCGGCCACTACGACGCTGAGGTCAAGACCACCTACAAGGCCAAGAAGCCCGTGCAGCTGCCCGGCGCCTACAACGTCAACATCAAGTTGGACATCACCTCCCACAACGAGGACTACACCATCGTGGAACAGTACGAACGCGCCGAGGGCCGCCACTCCACCGGCGGCATGGACGAGCTGTACAAGTGA | 15176 |
| D-R | ATGGTTAGCAAAGGTGAAGAAGATAATATGGCTATCATTAAGGAGTTCATGCGCTTCAAGGTGCACATGGAGGGCTCCGTGAACGGCCACGAGTTCGAGATCGAGGGCGAGGGCGAGGGCCGCCCCTACGAGGGCACCCAGACCGCCAAGCTGAAGGTGACCAAGGGTGGCCCCCTGCCCTTCGCCTGGGACATCCTGTCCCCTCAGTTCATGTACGGCTCCAAGGCCTACGTGAAGCACCCCGCCGACATCCCCGACTACTTGAAGCTGTCCTTCCCCGAGGGCTTCAAGTGGGAGCGCGTGATGAACTTCGAGGACGGCGGCGTGGTGACCGTGACCCAGGACTCCTCCCTGCAGGACGGCGAGTTCATCTACAAGGTGAAGCTGCGCGGCACCAACTTCCCCTCCGACGGCCCCGTAATGCAGAAGAAGACGATGGGCTGGGAGGCCTCCTCCGAGCGGATGTACCCCGAGGACGGCGCCCTGAAGGGCGAGATCAAGCAGAGGCTGAAGCTGAAGGACGGCGGCCACTACGACGCTGAGGTCAAGACCACCTACAAGGCCAAGAAGCCCGTGCAGCTGCCCGGCGCCTACAACGTCAACATCAAGTTGGACATCACCTCCCACAACGAGGACTACACCATCGTGGAACAGTACGAACGCGCCGAGGGCCGCCACTCCACCGGCGGCATGGACGAGCTGTACAAGTGA | 30151 |
| E | ATGGTCAGCAAAGGGGAGGAAGACAACATGGCCATCATAAAGGAGTTCATGCGCTTCAAGGTGCACATGGAGGGCTCCGTGAACGGCCACGAGTTCGAGATCGAGGGCGAGGGCGAGGGCCGCCCCTACGAGGGCACCCAGACCGCCAAGCTGAAGGTGACCAAGGGTGGCCCCCTGCCCTTCGCCTGGGACATCCTGTCCCCTCAGTTCATGTACGGCTCCAAGGCCTACGTGAAGCACCCCGCCGACATCCCCGACTACTTGAAGCTGTCCTTCCCCGAGGGCTTCAAGTGGGAGCGCGTGATGAACTTCGAGGACGGCGGCGTGGTGACCGTGACCCAGGACTCCTCCCTGCAGGACGGCGAGTTCATCTACAAGGTGAAGCTGCGCGGCACCAACTTCCCCTCCGACGGCCCCGTAATGCAGAAGAAGACGATGGGCTGGGAGGCCTCCTCCGAGCGGATGTACCCCGAGGACGGCGCCCTGAAGGGCGAGATCAAGCAGAGGCTGAAGCTGAAGGACGGCGGCCACTACGACGCTGAGGTCAAGACCACCTACAAGGCCAAGAAGCCCGTGCAGCTGCCCGGCGCCTACAACGTCAACATCAAGTTGGACATCACCTCCCACAACGAGGACTACACCATCGTGGAACAGTACGAACGCGCCGAGGGCCGCCACTCCACCGGCGGCATGGACGAGCTGTACAAGTGA | 15301 |
| E-R | ATGGTAAGCAAAGGTGAAGAAGATAATATGGCAATCATAAAGGAGTTCATGCGCTTCAAGGTGCACATGGAGGGCTCCGTGAACGGCCACGAGTTCGAGATCGAGGGCGAGGGCGAGGGCCGCCCCTACGAGGGCACCCAGACCGCCAAGCTGAAGGTGACCAAGGGTGGCCCCCTGCCCTTCGCCTGGGACATCCTGTCCCCTCAGTTCATGTACGGCTCCAAGGCCTACGTGAAGCACCCCGCCGACATCCCCGACTACTTGAAGCTGTCCTTCCCCGAGGGCTTCAAGTGGGAGCGCGTGATGAACTTCGAGGACGGCGGCGTGGTGACCGTGACCCAGGACTCCTCCCTGCAGGACGGCGAGTTCATCTACAAGGTGAAGCTGCGCGGCACCAACTTCCCCTCCGACGGCCCCGTAATGCAGAAGAAGACGATGGGCTGGGAGGCCTCCTCCGAGCGGATGTACCCCGAGGACGGCGCCCTGAAGGGCGAGATCAAGCAGAGGCTGAAGCTGAAGGACGGCGGCCACTACGACGCTGAGGTCAAGACCACCTACAAGGCCAAGAAGCCCGTGCAGCTGCCCGGCGCCTACAACGTCAACATCAAGTTGGACATCACCTCCCACAACGAGGACTACACCATCGTGGAACAGTACGAACGCGCCGAGGGCCGCCACTCCACCGGCGGCATGGACGAGCTGTACAAGTGA | 37012 |
| F | ATGGTCAGCAAGGGAGAGGAGGATAACATGGCCATAATTAAGGAGTTCATGCGCTTCAAGGTGCACATGGAGGGCTCCGTGAACGGCCACGAGTTCGAGATCGAGGGCGAGGGCGAGGGCCGCCCCTACGAGGGCACCCAGACCGCCAAGCTGAAGGTGACCAAGGGTGGCCCCCTGCCCTTCGCCTGGGACATCCTGTCCCCTCAGTTCATGTACGGCTCCAAGGCCTACGTGAAGCACCCCGCCGACATCCCCGACTACTTGAAGCTGTCCTTCCCCGAGGGCTTCAAGTGGGAGCGCGTGATGAACTTCGAGGACGGCGGCGTGGTGACCGTGACCCAGGACTCCTCCCTGCAGGACGGCGAGTTCATCTACAAGGTGAAGCTGCGCGGCACCAACTTCCCCTCCGACGGCCCCGTAATGCAGAAGAAGACGATGGGCTGGGAGGCCTCCTCCGAGCGGATGTACCCCGAGGACGGCGCCCTGAAGGGCGAGATCAAGCAGAGGCTGAAGCTGAAGGACGGCGGCCACTACGACGCTGAGGTCAAGACCACCTACAAGGCCAAGAAGCCCGTGCAGCTGCCCGGCGCCTACAACGTCAACATCAAGTTGGACATCACCTCCCACAACGAGGACTACACCATCGTGGAACAGTACGAACGCGCCGAGGGCCGCCACTCCACCGGCGGCATGGACGAGCTGTACAAGTGA | 13939 |
| F-R | ATGGTAAGCAAAGGAGAAGAAGATAATATGGCCATAATTAAGGAGTTCATGCGCTTCAAGGTGCACATGGAGGGCTCCGTGAACGGCCACGAGTTCGAGATCGAGGGCGAGGGCGAGGGCCGCCCCTACGAGGGCACCCAGACCGCCAAGCTGAAGGTGACCAAGGGTGGCCCCCTGCCCTTCGCCTGGGACATCCTGTCCCCTCAGTTCATGTACGGCTCCAAGGCCTACGTGAAGCACCCCGCCGACATCCCCGACTACTTGAAGCTGTCCTTCCCCGAGGGCTTCAAGTGGGAGCGCGTGATGAACTTCGAGGACGGCGGCGTGGTGACCGTGACCCAGGACTCCTCCCTGCAGGACGGCGAGTTCATCTACAAGGTGAAGCTGCGCGGCACCAACTTCCCCTCCGACGGCCCCGTAATGCAGAAGAAGACGATGGGCTGGGAGGCCTCCTCCGAGCGGATGTACCCCGAGGACGGCGCCCTGAAGGGCGAGATCAAGCAGAGGCTGAAGCTGAAGGACGGCGGCCACTACGACGCTGAGGTCAAGACCACCTACAAGGCCAAGAAGCCCGTGCAGCTGCCCGGCGCCTACAACGTCAACATCAAGTTGGACATCACCTCCCACAACGAGGACTACACCATCGTGGAACAGTACGAACGCGCCGAGGGCCGCCACTCCACCGGCGGCATGGACGAGCTGTACAAGTGA | 34893 |
| G | ATGGTCAGTAAGGGAGAGGAGGATAATATGGCCATAATCAAAGAGTTCATGCGCTTCAAGGTGCACATGGAGGGCTCCGTGAACGGCCACGAGTTCGAGATCGAGGGCGAGGGCGAGGGCCGCCCCTACGAGGGCACCCAGACCGCCAAGCTGAAGGTGACCAAGGGTGGCCCCCTGCCCTTCGCCTGGGACATCCTGTCCCCTCAGTTCATGTACGGCTCCAAGGCCTACGTGAAGCACCCCGCCGACATCCCCGACTACTTGAAGCTGTCCTTCCCCGAGGGCTTCAAGTGGGAGCGCGTGATGAACTTCGAGGACGGCGGCGTGGTGACCGTGACCCAGGACTCCTCCCTGCAGGACGGCGAGTTCATCTACAAGGTGAAGCTGCGCGGCACCAACTTCCCCTCCGACGGCCCCGTAATGCAGAAGAAGACGATGGGCTGGGAGGCCTCCTCCGAGCGGATGTACCCCGAGGACGGCGCCCTGAAGGGCGAGATCAAGCAGAGGCTGAAGCTGAAGGACGGCGGCCACTACGACGCTGAGGTCAAGACCACCTACAAGGCCAAGAAGCCCGTGCAGCTGCCCGGCGCCTACAACGTCAACATCAAGTTGGACATCACCTCCCACAACGAGGACTACACCATCGTGGAACAGTACGAACGCGCCGAGGGCCGCCACTCCACCGGCGGCATGGACGAGCTGTACAAGTGA | 17056 |
| G-R | ATGGTAAGTAAAGGAGAAGAAGATAATATGGCAATAATCAAAGAGTTCATGCGCTTCAAGGTGCACATGGAGGGCTCCGTGAACGGCCACGAGTTCGAGATCGAGGGCGAGGGCGAGGGCCGCCCCTACGAGGGCACCCAGACCGCCAAGCTGAAGGTGACCAAGGGTGGCCCCCTGCCCTTCGCCTGGGACATCCTGTCCCCTCAGTTCATGTACGGCTCCAAGGCCTACGTGAAGCACCCCGCCGACATCCCCGACTACTTGAAGCTGTCCTTCCCCGAGGGCTTCAAGTGGGAGCGCGTGATGAACTTCGAGGACGGCGGCGTGGTGACCGTGACCCAGGACTCCTCCCTGCAGGACGGCGAGTTCATCTACAAGGTGAAGCTGCGCGGCACCAACTTCCCCTCCGACGGCCCCGTAATGCAGAAGAAGACGATGGGCTGGGAGGCCTCCTCCGAGCGGATGTACCCCGAGGACGGCGCCCTGAAGGGCGAGATCAAGCAGAGGCTGAAGCTGAAGGACGGCGGCCACTACGACGCTGAGGTCAAGACCACCTACAAGGCCAAGAAGCCCGTGCAGCTGCCCGGCGCCTACAACGTCAACATCAAGTTGGACATCACCTCCCACAACGAGGACTACACCATCGTGGAACAGTACGAACGCGCCGAGGGCCGCCACTCCACCGGCGGCATGGACGAGCTGTACAAGTGA | 35375 |
| H | ATGGTTAGCAAGGGGGAGGAGGACAACATGGCGATCATTAAGGAGTTCATGCGCTTCAAGGTGCACATGGAGGGCTCCGTGAACGGCCACGAGTTCGAGATCGAGGGCGAGGGCGAGGGCCGCCCCTACGAGGGCACCCAGACCGCCAAGCTGAAGGTGACCAAGGGTGGCCCCCTGCCCTTCGCCTGGGACATCCTGTCCCCTCAGTTCATGTACGGCTCCAAGGCCTACGTGAAGCACCCCGCCGACATCCCCGACTACTTGAAGCTGTCCTTCCCCGAGGGCTTCAAGTGGGAGCGCGTGATGAACTTCGAGGACGGCGGCGTGGTGACCGTGACCCAGGACTCCTCCCTGCAGGACGGCGAGTTCATCTACAAGGTGAAGCTGCGCGGCACCAACTTCCCCTCCGACGGCCCCGTAATGCAGAAGAAGACGATGGGCTGGGAGGCCTCCTCCGAGCGGATGTACCCCGAGGACGGCGCCCTGAAGGGCGAGATCAAGCAGAGGCTGAAGCTGAAGGACGGCGGCCACTACGACGCTGAGGTCAAGACCACCTACAAGGCCAAGAAGCCCGTGCAGCTGCCCGGCGCCTACAACGTCAACATCAAGTTGGACATCACCTCCCACAACGAGGACTACACCATCGTGGAACAGTACGAACGCGCCGAGGGCCGCCACTCCACCGGCGGCATGGACGAGCTGTACAAGTGA | 11830 |
| H-R | ATGGTTAGCAAAGGTGAAGAAGATAATATGGCGATCATTAAGGAGTTCATGCGCTTCAAGGTGCACATGGAGGGCTCCGTGAACGGCCACGAGTTCGAGATCGAGGGCGAGGGCGAGGGCCGCCCCTACGAGGGCACCCAGACCGCCAAGCTGAAGGTGACCAAGGGTGGCCCCCTGCCCTTCGCCTGGGACATCCTGTCCCCTCAGTTCATGTACGGCTCCAAGGCCTACGTGAAGCACCCCGCCGACATCCCCGACTACTTGAAGCTGTCCTTCCCCGAGGGCTTCAAGTGGGAGCGCGTGATGAACTTCGAGGACGGCGGCGTGGTGACCGTGACCCAGGACTCCTCCCTGCAGGACGGCGAGTTCATCTACAAGGTGAAGCTGCGCGGCACCAACTTCCCCTCCGACGGCCCCGTAATGCAGAAGAAGACGATGGGCTGGGAGGCCTCCTCCGAGCGGATGTACCCCGAGGACGGCGCCCTGAAGGGCGAGATCAAGCAGAGGCTGAAGCTGAAGGACGGCGGCCACTACGACGCTGAGGTCAAGACCACCTACAAGGCCAAGAAGCCCGTGCAGCTGCCCGGCGCCTACAACGTCAACATCAAGTTGGACATCACCTCCCACAACGAGGACTACACCATCGTGGAACAGTACGAACGCGCCGAGGGCCGCCACTCCACCGGCGGCATGGACGAGCTGTACAAGTGA | 31013 |

**Reference**

1. Jones, P.G., R.A. VanBogelen, and F.C. Neidhardt, *Induction of proteins in response to low temperature in Escherichia coli.* Journal of bacteriology, 1987. **169**(5): p. 2092-2095.

2. Han, C., et al., *Polysome profiling followed by quantitative PCR for identifying potential micropeptide encoding long non-coding RNAs in suspension cell lines.* STAR protocols, 2022. **3**(1): p. 101037.

3. Martin, M., *Cutadapt removes adapter sequences from high-throughput sequencing reads.* EMBnet. journal, 2011. **17**(1): p. 10-12.

4. Langmead, B. and S.L. Salzberg, *Fast gapped-read alignment with Bowtie 2.* Nature methods, 2012. **9**(4): p. 357-359.

5. Li, H., et al., *The sequence alignment/map format and SAMtools.* bioinformatics, 2009. **25**(16): p. 2078-2079.
